1       Development of a potent and protective germline-like antibody  
2                   lineage against Zika virus in a convalescent human

3

4   Fei Gao<sup>1¶</sup>, Xiaohe Lin<sup>2&</sup>, Linling He<sup>2</sup>, Ruoke Wang<sup>1</sup>, Han Wang<sup>1</sup>, Xuanling Shi<sup>1</sup>,  
5   Fuchun Zhang<sup>3</sup>, Chibiao Yin<sup>3</sup>, Linqi Zhang<sup>1\*</sup>, Jiang Zhu<sup>2\*</sup>, Lei Yu<sup>3\*</sup>

6

7   <sup>1</sup> Comprehensive AIDS Research Center, Collaborative Innovation Center for  
8   Diagnosis and Treatment of Infectious Diseases, Department of Basic Medical  
9   Sciences, School of Medicine, Tsinghua University, Beijing, China.

10  <sup>2</sup> Department of Integrative Structural and Computational Biology, Department  
11  of Immunology and Microbiology, The Scripps Research Institute, La Jolla, CA,  
12  United States

13  <sup>3</sup> Guangzhou Eighth People's Hospital, Guangzhou Medical University,  
14  Guangzhou, China.

15

16  \* Co-corresponding authors (to whom correspondence should be addressed)

17  LZ: Phone +8610-62788131; Email: [zhanglinqi@mail.tsinghua.edu.cn](mailto:zhanglinqi@mail.tsinghua.edu.cn)

18  JZ: Phone (858) 784-8157; Email: [jiang@scripps.edu](mailto:jiang@scripps.edu)

19  LY: Phone +8620-83816277; Email: [leiyuforngs@126.com](mailto:leiyuforngs@126.com)

20

21

22

## 23 **Abstract**

24 Zika virus (ZIKV) specific neutralizing antibodies hold a great promise for  
25 antibody-based interventions and vaccine design against ZIKV infection.  
26 However, their development in infected patients remain unknown. Here, we  
27 report on the dynamic development of a potent and protective ZIKV-specific  
28 human antibody ZK2B10 initially isolated from a ZIKV convalescent individual  
29 using next-generation sequencing (NGS). The unbiased repertoire analysis  
30 showed dramatic changes in many families of heavy and light chain variable  
31 regions. However, lineage tracing of ZK2B10 revealed limited somatic  
32 hypermutation throughout the 12 months since the onset of symptom. In  
33 particular, NGS-derived germline-like somatic variants neutralized and  
34 protected mice from lethal challenge of ZIKV without detectable cross-reactivity  
35 with Dengue virus (DENV). Site-directed mutagenesis identified two residues  
36 within  $\lambda$  chain, N31 and S91 that are essential to the functional maturation. The  
37 dynamic features unveiled here will assist us to better understand the  
38 pathogenesis of ZIKV infection and inform rational design of vaccines.

## 39 **Author summary**

40 Recently emerged ZIKV is associated with severe neurological complications  
41 such as Guillain–Barré syndrome in adults and congenital microcephaly in  
42 newborns. No ZIKV-specific therapeutics or vaccines are currently available.  
43 We and others have identified a number of neutralizing antibodies capable of  
44 protecting experimental animals from ZIKV infection. However, the

45 development of these potent antibodies during ZIKV natural infection remains  
46 unknown. Here, we report on the longitudinal analysis of one such antibody  
47 ZK2B10 using next-generation sequencing (NGS), bioinformatics and  
48 functional analysis. We found that the ZK2B10 germline-like antibodies  
49 possess strong neutralizing activity *in vitro* and impressive protectivity against  
50 lethal ZIKV infection *in vivo*. These findings suggest that the potent and  
51 protective antibody response against ZIKV can be generated within relative  
52 short term with high germline identity which provide great hope and promise for  
53 successful vaccine development against ZIKV.

#### 54 **Key words**

55 Zika virus infection, Guillain–Barré syndrome, microcephaly, neutralizing  
56 antibody, antibody repertoire, next-generation sequencing

#### 57 **Introduction**

58 Zika virus (ZIKV), a member of the *Flavivirus genus* of the *Flaviviridae* family,  
59 is an emerging mosquito-borne pathogen. ZIKV is closely related to other  
60 flavivirus such as dengue (DENV 1, 2, 3 and 4), yellow fever (YFV), West Nile  
61 (WNV), Japanese encephalitis (JEV), and tick-borne encephalitis (TBEV)  
62 viruses [1]. Since ZIKV was first identified in 1947 among rhesus macaques of  
63 Uganda Zika forest, its new variants have become increasingly prevalent and  
64 adapted to the human population as recent outbreaks have spread across the  
65 Americas, Caribbean, and Southeast Asia [2-5]. At the peak of the 2016

66 outbreak, several incidents of imported ZIKV infection were identified in  
67 mainland China [6]. In contrast to early and previous epidemics, the recent  
68 spread of ZIKV has been associated with severe neurological complications  
69 such as Guillain–Barré syndrome in adults and microcephaly in fetuses and  
70 newborns [7-10]. Currently, no ZIKV-specific therapeutics or vaccines are  
71 available. The high prevalence of the vectors and the continuing evolution of  
72 viral species raised serious public health concerns in the near future [11].

73 The surface envelope glycoprotein (E) of flaviviruses mediates entry and  
74 presents a potential target of neutralizing antibodies. Numbers of E-targeting  
75 monoclonal antibodies (mAbs) have been identified with potent neutralizing  
76 activity and epitope specificity [12-29]. Previously, we isolated and  
77 characterized a panel of E-targeting mAbs from plasma and memory B cells  
78 from sequential blood samples of a DENV-naïve ZIKV-infected convalescent  
79 patient (Pt1) who acquired ZIKV infection in Venezuela during the 2016  
80 outbreak and then returned to China [6, 24]. Among them, ZK2B10 is the most  
81 potent in neutralizing ZIKV and have no detectable reactivity with DENV 1 or 2  
82 [24]. ZK2B10 also demonstrated complete prophylactic and impressive  
83 therapeutic activities against lethal ZIKV challenge in mouse models of ZIKV  
84 infection and microcephaly [30]. Crystal structure and cryo-EM analysis reveal  
85 that ZK2B10 recognizes the lateral ridge of DIII and blocks infection at steps  
86 between post-attachment and membrane fusion [31]. Since ZK2B10 could  
87 serve as a promising candidate for antibody-based interventions, the ontogeny

88 of ZK2B10 could gain insight into the protective antibody response after ZIKV  
89 natural infection, as well as inform rational vaccine design. Furthermore, up to  
90 date, diverse vaccine candidates are capable of conferring complete protection  
91 against ZIKV challenge in mice or nonhuman primates (NHPs) have been  
92 evaluated in preclinical and clinical studies [16, 32, 33]. It is therefore  
93 imperative to investigate the dynamic and characteristic of antibody repertoire  
94 across ZIKV infection longitudinally, which will provide insights into its  
95 pathogenesis and the molecular requirement for the development of an  
96 effective ZIKV vaccine.

97 In this study, we applied long-read next-generation sequencing (NGS) and  
98 an unbiased repertoire capture method to analyze the B cell repertoire  
99 longitudinally of Pt1 from the early acute phase to the late convalescent phase  
100 as we previously established [34]. We obtained tens of millions of antibody  
101 sequences from a total of seven sequential time points including Day 4, Day  
102 15, Month 2, Month 3, Month 6, Month 10 and Month 12 after the onset of  
103 symptoms. We first performed longitudinal analysis of the antibody repertoire,  
104 focusing on germline gene usage, CDR3 loop length, and degree of somatic  
105 hypermutation (SHM). Our data revealed the antibody repertoire profiles of  
106 ZIKV infection with diverse usage of antibody germline gene combined with  
107 steady CDR3 loop length, making a clear distinction to chronic HIV infection,  
108 which exhibited highly matured repertoire profiles with enrichment of specific  
109 germline gene and long HCDR3 loop length [34, 35] . The emerging of

110 germline-like antibodies was observed on Day 15 after symptom onset. We  
111 further traced the antibody lineage of ZK2B10 and investigated the maturation  
112 pathway. Our results show that ZK2B10 generated in relatively small numbers  
113 and grouped with highly germline-like antibodies identified at Day 15 after the  
114 onset of symptoms. The somatic variants of ZK2B10 further synthesized for  
115 functional characterizations both *in vitro* and *in vivo*. Germline-like heavy chain  
116 somatic variants demonstrated strong neutralizing activity and protective  
117 potential in lethal ZIKV challenge mouse model. While two substitutions of  
118 ZK2B10  $\lambda$  chain, N31 on LCDR1 and S91 on LCDR3, were identified as the  
119 critical residues for ZK2B10 functional maturation. Taken together, our  
120 repertoire analyses and lineage tracing elucidated the maturation pathways of  
121 potent and protective antibody ZK2B10, and highlighted germline-like  
122 antibodies play a noticeable role in protective immunity against ZIKV infection.

## 123 **Results**

### 124 **Dynamic B cell repertoire response throughout ZIKV infection**

125 Next-generation sequencing (NGS) is a powerful tool for probing antibody  
126 responses to natural infection and vaccination [36-38]. Extensive studies of  
127 broadly neutralizing antibodies (bNAbs) and their lineage development using  
128 NGS have revealed the underappreciated complexity and diversity of B cell  
129 repertoires in HIV-1-infected individuals during chronic infection [39-42]. Here,  
130 we performed a longitudinal NGS analysis of antibody repertoire in Pt1 to  
131 delineate the dynamic B cell response to ZIKV infection following the procedure

132 highlighted in Fig 1A. We analyzed seven sequential time points from the acute  
133 phase (Day 4 and Day 15 after the onset of symptoms) to the convalescent  
134 phase (Month 2, 3, 6, 10 and 12 after the onset of symptoms). We combined  
135 5'-RACE polymerase chain reaction (PCR) and single reverse primers in  
136 template preparation to ensure the NGS in an long-read (600 bp) and unbiased  
137 manner as previously reported (S1 Fig.) [34, 43-46]. The sequencing yielded a  
138 total of 14.2 million heavy chains and 14.1 million light ( $\kappa$  and  $\lambda$ ) chains in two  
139 separate NGS runs on the Ion S5 GeneStudio platform (S1 Table). The  
140 *Antibodyomics* 2.0 pipeline was used to process, annotate, and analyze the  
141 NGS data, rendering 1.3 to 2.9 million reads per time point (S1 Table). Of these  
142 sequences, 55.3% to 71.2% are high-quality, full-length antibody variable  
143 regions which were used for the analyses of B cell repertoire profiles (S1 Table).  
144 Furthermore, we traced the lineage of ZK2B10 based on the NGS-derived data  
145 and synthesized representative somatic variants for functional  
146 characterizations both *in vitro* and *in vivo* (Fig 1A).

147 Overall, Pt1 exhibited a diverse and dynamic distribution of germline gene  
148 expression (Fig 1B). A few germline genes are dominant in all seven time points  
149 such as IGHV1-69, IGKV3-20 and IGLV1-40 with average over 15.21% (Fig 1B,  
150 left). In contrast, some specific germline genes were noticed with low frequency,  
151 such as IGHV1-8, the  $V_H$  germline gene of ZK2B10, ranging from 0.98% to 4.80%  
152 in seven time points (Fig 1B, left). The  $V_L$  germline gene of ZK2B10,  
153 corresponding to IGLV1-47, ranging from 2.58% to 5.34% (Fig 1B, right).

154 However, the low frequency of IGHV1-8 and IGLV1-47 was unexpected,  
155 suggesting that ZK2B10 did not represent a major B cell lineage in the  
156 repertoire spanning the acute and convalescent phases of ZIKV infection. In  
157 addition, there appeared to be no correlation between the potency of a ZIKV  
158 E-targeting mAb and its lineage expansion or prevalence, as indicated by the  
159 low frequency of the ZK2B10 germline gene family.

160 We then determined the degree of somatic hypermutation (SHM) or  
161 germline divergence of each time point from early acute phase to late  
162 convalescent phase. As shown in Fig 1C, there is a significant increase in the  
163 population of germline-like sequences at Day 15 for both heavy and light chains.  
164 As a consequence, the average SHM of heavy,  $\kappa$  chain and  $\lambda$  chain repertoire  
165 dropped to 6.25%, 5.92% and 5.91% on Day 15, respectively. Of note, the SHM  
166 decreased in most V gene families on Day 15 without preference (S2 Fig.). As  
167 for the  $V_H$  germline gene of ZK2B10, IGHV1-8, accounted for only 6.45% SHM  
168 on Day 15 and for 7.23% to 13.60% in other time points (S2 Fig., left). The  $V_L$   
169 germline gene of ZK2B10, corresponding to IGLV1-47, presented 5.72% SHM  
170 at Day 15, while 6.70% to 9.04% at other time points studied (S2 Fig., right).  
171 These results suggest a drastic shift in repertoire composition likely caused by  
172 a rapid plasmablast response during the acute phase of ZIKV infection. The  
173 emerging and development of ZK2B10 could represent this kind of antibody  
174 response. These patterns corroborate the fact that plasmablasts from ZIKV-  
175 infected, flavivirus-naïve individuals exhibited less somatic hypermutation or



176 clonal expansion than those from ZIKV-infected, DENV-immune individuals,  
177 which with many derived from common memory B cell clones [19, 47].  
178 Interestingly, the similar pattern has also been reported for an HIV-1 patient  
179 undergoing chronic infection in response to a rapidly mutating envelope spike  
180 [44].

181 We next determined changes in the CDR3 loop length. Due to the diversity  
182 of the D gene, a rather dispersed distribution in HCDR3 loop length was  
183 observed as compared to a steady, canonical CDR3 loop length distribution  
184 obtained for  $\kappa$  and  $\lambda$  chains (Fig 1D). The HCDR3 loops were mainly distributed  
185 at the range of 9-aa to 15-aa (Fig 1D, left). As for the light chain, 9-aa KCDR3  
186 loops accounted for 79.3% to 88.2% of the  $\kappa$  chain repertoire, while 9-aa to 11-  
187 aa LCDR3 loops accounted for 81.3% to 94.9% of the  $\lambda$  chain repertoire (Fig  
188 1D, middle and right). These results revealed a comprehensive view of a  
189 human B cell repertoire during ZIKV infection, which revealed the  
190 characteristics of acute and transient infection.

### 191 **ZK2B10 lineage-specific antibody response during ZIKV infection**

192 To probe the maturation pathway of ZK2B10, we traced the mAb lineage at  
193 each time point within the NGS-derived repertoire (Figs 2A and 2B). A CDR3  
194 identity of 95% was used as the cutoff for identifying sequences evolutionarily  
195 related to ZK2B10 heavy or  $\lambda$  chain (Figs 2A and 2B, shown as magenta dots  
196 on the 2D plots). Unexpectedly, from the library of unbiased amplified germline  
197 gene families, we could not find any ZK2B10 heavy chain somatic variants in

198 the repertoire at all seven time points, suggesting that ZK2B10 lineage have  
199 an extremely low frequency (Fig 2A, upper panel). To make an in-depth  
200 insight into ZK2B10 lineage development, we performed another NGS  
201 experiment on four antibody libraries at Day 15, Months 2, 3, and 6, using a  
202 degenerate forward primer to target the ZK2B10 heavy chain and its putative  
203 germline gene, IGHV1-8 (Fig 2A, lower panel). Gene-specific NGS yielded  
204 1715 ZK2B10-like heavy chains for Day 15 and only two for Month 3 (Fig 2A,  
205 lower panel). As for  $\lambda$  chain repertoire, ZK2B10  $\lambda$  chain somatic variants were  
206 detectable on Day 4 but reached the peak on Day 15 with 495 identified  
207 variants, and persisted into Month 12 despite a noticeable decline on Month 10  
208 (Fig 2B). Of note, due to the lack of a D gene, light chains do not possess  
209 unambiguous sequence signatures for CDR3-based lineage tracing.  
210 Nonetheless, our data suggests that ZK2B10 lineage antibodies were induced  
211 rapidly and transiently at the end of acute phase during ZIKV infection.  
212 Interestingly, the majority of ZK2B10 somatic variants showed a germline  
213 divergence of less than 5.0% in both heavy and  $\lambda$  chain repertoires (Fig 2A,  
214 low panel and Fig 2B).

215 To further study the maturation pathway of ZK2B10, we selected  
216 representative somatic variants for antibody synthesis and functional  
217 characterization. The hierarchical clustering method was used for  
218 representative variants selection as previously described [34]. In addition to the  
219 dominant sequences, a consensus selection were conducted base on the

220 sequence characteristics to ensure their representativeness [34]. Of these, 16  
221 representative heavy chains were selected with 14 from Day 15 and 2 from  
222 Month 3, and 11 representative  $\lambda$  chains with 7 from Day 15 and 4 from Month  
223 3 (Figs 2C and 2D). Surprisingly, among them, 2H-1 and 2L-1 are 100%  
224 identical to their putative germline gene, corresponding to IGHV1-8 and IGLV1-  
225 47, with sequencing read frequencies as high as 58.7% (1006/1715) and 29.7%  
226 (147/495), respectively (Figs 2C and 2D). Furthermore, all these ZK2B10  
227 somatic variants showed a low degree of SHM: the average identity of  
228 representative heavy chains with respect to its putative germline gene, IGHV1-  
229 8, was 96.81%; as for  $\lambda$  chains, the average germline identity to IGLV1-47 was  
230 also as high as 96.79% (Figs 2C and 2D). The variable region sequences and  
231 alignments of representative ZK2B10 somatic variants were shown in Fig 3. To  
232 summarize, ZK2B10 lineage represents transient plasmablast response with  
233 low degree of somatic hypermutation at the end of acute phase of ZIKV  
234 infection.

### 235 **Functional characterization of ZK2B10 somatic variants**

236 The representative ZK2B10 somatic variants were then synthesized and paired  
237 with their respective wild-type (WT) partner chains for full-length human IgG1  
238 expression and functional characterization. Of the 16 synthesized ZK2B10  
239 heavy chain somatic variants, 11 (2H-1, -2, -3, -4, -5, -6, -9, -10, -14, -15, and  
240 -16) could be expressed when paired with WT ZK2B10  $\lambda$  chain (Fig 4A). We  
241 next measured their binding ability to E glycoprotein and E DIII of ZIKV by

242 ELISA. Among the 11 mAbs, 8 (2H-1, -4, -5, -6, -9, -10, -15, and -16)  
243 demonstrated strong binding affinities for E and E DIII at the similar level to  
244 ZK2B10, with the half-maximal effective concentrations ( $EC_{50}$ ) ranging from 3.4  
245 to 11.2 ng/ml, while the remaining 3 mAbs (2H-2, -3, and -14) showed weak  
246 affinities (Fig 4A). These mAbs were then subjected to a plaque reduction  
247 neutralization test against two ZIKV strains, GZ01 (Asian) and MR766 (African),  
248 and DENV 2 (Fig 4A). Consistent with their binding abilities, the 8 strong  
249 binders (2H-1, -4, -5, -6, -9, -10, -15, and -16) neutralized GZ01 and MR766  
250 potently (Fig 4A). The half-maximal inhibitory concentrations ( $IC_{50}$ ) range from  
251 14.1 to 82.4 ng/ml, which are comparable to WT ZK2B10 and other potent E-  
252 targeting mAbs isolated from ZIKV-infected, DENV-naïve human subjects (Fig  
253 4A) [18, 20, 21, 24, 26]. Not surprisingly, 2H-2 failed to show detectable  
254 potency ( $IC_{50} > 500$  ng/ml to both GZ01 and MR766), 2H-3 showed only modest  
255 neutralizing activity ( $IC_{50} = 289.4$  ng/ml to GZ01 and 334.1 ng/ml to MR766),  
256 and 2H-14 failed to demonstrate high potency against ZIKV as well ( $IC_{50} = 489.1$   
257 ng/ml to GZ01 and  $IC_{50} > 500$  ng/ml to MR766) (Fig 4A). All these mAbs showed  
258 no cross-neutralizing activities with DENV 2 (Fig 4A). Strikingly, with 100%  
259 identity to IGHV1-8, 2H-1 showed high affinity for full-length E and E DIII of  
260 ZIKV with  $EC_{50}$  values of 5.3 ng/ml and 3.4 ng/ml, respectively (Fig 4A).  
261 Meanwhile, 2H-1 potently neutralized GZ01 and MR766, with  $IC_{50}$  values of  
262 14.1 ng/ml and 19.4 ng/ml, respectively (Fig 4A). Notably, 1006 out of 1715  
263 (58.7%) ZK2B10-like heavy chains from Day 15 were identical to 2H-1,

264 confirming that this germline-like mAb lineage emerged at the peak of  
265 plasmablast response. According to the alignment compared to IGHV1-8  
266 germline sequence, the functional loss of 2H-2, -3 and -14 could be explained  
267 potentially by the mutation of D39 located toward the end of HCDR1 (Fig 3A).  
268 As for 11 synthesized ZK2B10-like  $\lambda$  chains, 7 (2L-1, -2, -3, -6, -8, -9, and -11)  
269 were expressible when paired with WT ZK2B10 heavy chain. Surprisingly, 5  
270 (2L-1, -3, -8, -9, and -11) of these 7  $\lambda$  variants failed to bind ZIKV E or E DIII  
271 combined with undetectable neutralizing activities against ZIKV (Fig 4B).  
272 Among them, the sequence of 2L-1 is 100% identical to IGLV1-47 and  
273 represents a large portion of the Day 15  $\lambda$  chain population (147 out of 495,  
274 29.7%) (Fig 4B). The reconstituted mAbs containing 2L-2 and 2L-6  
275 demonstrated rather weak binding and neutralizing activities compared to WT  
276 ZK2B10 (Fig 4B). Together with the sequence alignments, these patterns  
277 presume to that S31N on LCDR1 and in A91S on LCDR3 could be critical for  
278 the maturation of ZK2B10  $\lambda$  chain (Fig 3B).

279 To summarize, the results from functional characterizations of ZK2B10  
280 heavy chain somatic variants confirmed the hypothesis that this mAb lineage  
281 represents a transient yet effective naïve B cell response to ZIKV infection. The  
282 loss of function observed for most  $\lambda$  chain somatic variants, in which  $V_L$  was  
283 reverted to IGLV1-47, suggested that light chain maturation is crucial for the  
284 ZK2B10 lineage to acquire its potency and specificity, reminiscent of the case  
285 of the HIV-1 bNAb, VRC01 [44].

286

287 **Protective potential of ZK2B10 somatic variants in a mouse model**

288 Previously, we have demonstrated ZK2B10 can protect mouse from lethal ZIKV  
289 infection and microcephaly [24, 30]. Such animal study will not only confirm the  
290 accuracy of our repertoire analyses but also provide clues as to the functional  
291 diversity of the ZK2B10 lineage *in vivo*. To this end, we tested the *in vivo*  
292 protection against ZIKV lethal infection of representative ZK2B10 somatic  
293 variants in AG6 mice (C57BL/6 mice deficient in IFN $\alpha$ , - $\beta$ , and - $\gamma$  receptors)  
294 following protocol highlighted in Fig 4C [24, 30, 48, 49]. Briefly, we  
295 administrated 300 $\mu$ g of each ZK2B10-like mAb, ZK2B10 as positive control, or  
296 MERS-4 as negative control to groups of four AG6 mice, from 4 to 6 weeks in  
297 age, via the intraperitoneal (i.p.) route (Fig 4C) [50]. On the following day, the  
298 animals were challenged with 10<sup>4</sup> plaque-forming units (PFUs) of ZIKV Asian  
299 strain GZ01 via the intraperitoneal (i.p.) route (Fig 4C). Animals were monitored  
300 for the survival rate up to 14 days after ZIKV challenge, and for viral RNA level  
301 in blood on 5 and 12 days after ZIKV challenge (Fig 4C). As expected, *in vivo*  
302 protection of mAbs was correlated with their *in vitro* neutralization, as  
303 previously reported [30]. For example, the heavy chain variants with potent  
304 neutralizing activities *in vitro* (2H-1, -4, -6, -9, -10, -15 and -16) provided  
305 complete protection with a survival rate of 100% up to 14 days after ZIKV  
306 challenge (Fig 4D). The RNA load in these groups was suppressed in blood  
307 with distinguishable level from the MERS-4 group (Fig 4F). Exceptionally, 2H-

308 2, -3 and -14 failed to offer any protection with a median survival time of 7.25  
309 to 8 days after ZIKV challenge (Fig 4D). The viral RNA levels measured in mice  
310 treated by them were 3.72 to 4.45 log<sub>10</sub> greater on average than the ZK2B10  
311 group on day 5 after ZIKV challenge, respectively (Fig 4F). In contrast, all of  
312 the  $\lambda$  chain variants demonstrated an invariant survival rate identical to that of  
313 the negative control MERS-4 and failed to suppress viral replication (Figs 4E  
314 and 4G). Therefore, *in vivo* evaluation of representative ZK2B10 somatic  
315 variants confirmed the differential effect of heavy and  $\lambda$  chains on antibody  
316 function, consistent with the *in vitro* characterization by ELISA and  
317 neutralization assays.

### 318 **Critical residues for ZK2B10 functional maturation**

319 To the further investigation of the maturation pathway of the ZK2B10 lineage,  
320 we performed reverse mutagenesis and structural analysis to identify ‘hotspot’  
321 residues. Before that, we aligned the amino acid sequences of representative  
322 ZK2B10 heavy and  $\lambda$  chain variants with their putative germline genes, IGHV1-  
323 8 and IGLV1-47, respectively (Fig 3). For heavy chain, 2H-2, 2H-3, and 2H-14  
324 lose their potency to ZIKV both *in vitro* and *in vivo*. These 3 heavy chains  
325 possess a single substitution mutation at the D39 with respect to their germline  
326 gene (Fig 3A). To test that, we conducted reverse mutagenesis on 2H-2 (A39D),  
327 2H-3 (E39D), and 2H-14 (G39D) and characterized the function of these  
328 mutants by ELISA and neutralization assays. As shown in Fig 5A, 2H-3 (E39D)  
329 and 2H-14 (G39D) mutants regained their ZIKV E-binding and neutralizing

330 activities, approaching the level of WT ZK2B10. Due to the use of a different  
331  $V_H$  germline gene, IGHV1-69, the 2H-2 (A39D) mutant was ineffective (Fig 5A).  
332 This result suggested that the ZK2B10 lineage has a restricted  $V_H$  gene usage  
333 to achieve high affinity and potency against ZIKV. Based on the crystal  
334 structure of ZK2B10 in complex with ZIKV E DIII, 4 residues within HCDR3 loop  
335 (Y111, Y114, Y116 and Y118) were directly involved in the contact interface  
336 [31]. Although D39 is on HCDR1 loop, it forms hydrogen bonds with Y115 and  
337 Y117 on the opposite side of the HCDR3 loop, thus stabilizing the HCDR3  
338 conformation (Fig 5C). These results provide further evidence that the ZK2B10  
339 lineage was indeed generated during the naïve B cell response to acute ZIKV  
340 infection, with critical residues encoded by the germline gene. For  $\lambda$  chain  
341 variants, two critical mutations were identified that potentially contribute to the  
342 maturation of ZK2B10 lineage (Fig 3B). One such mutation, located on the  
343 LCDR1 loop, is N31, which is shared by the weak-functional variants 2L-2 and  
344 2L-6, as well as WT ZK2B10  $\lambda$  chain (Fig 3B). The other is at position 91 on  
345 LCDR3 loop, which is S91 in WT ZK2B10  $\lambda$  chain but predominantly A91 in all  
346 these weak- or non-functional  $\lambda$  chain variants (Fig 3B). Thus, N31N and S91  
347 could be the critical mutations for ZK2B10  $\lambda$  chain maturation. We first  
348 examined the effect of these two mutations individually by performing site-  
349 directed mutagenesis on 2L-1, which is 100% identical to germline gene  
350 IGLV1-47. Neither S31N nor A91S could effectively render the germline  
351 antibody functional (Fig 5B). We then introduced a double mutation



352 (S31N+A91S) into 2L-1, which, as expected, bound to ZIKV E and E DIII with  
353 high affinity and potently neutralized ZIKV at the same level of WT ZK2B10 (Fig  
354 5B). As shown by the crystal structure, 5 residues within ZK2B10  $\lambda$  chain (N31,  
355 N32, Y33, R51, D94 and L96) directly involved in the in the contact interface  
356 [31]. For the two identified critical residues, N31 directly interacts with T309 on  
357 ZIKV E DIII, while S91 forms a hydrogen bond with N32, which interacts with  
358 T335 on ZIKV E DIII (Fig 5D). In brief, our combined analyses of NGS data,  
359 antibody functions, and complex structure confirm that residues N31 and S91  
360 within  $\lambda$  chain are essential to the function of ZK2B10, thus posing a major  
361 barrier to the functional maturation of this ZIKV E DIII-directed antibody lineage.

## 362 **Discussion**

363 In this study, we delineated the human B cell repertoire profiles across ZIKV  
364 natural infection by accurate NGS approach. The comprehensive analyses  
365 showed antibody repertoire profiles with diverse germline usage, lower IgG  
366 somatic hypermutation rate and steady CDR3 loop length. The tracking of  
367 ZK2B10 revealed the dynamic of an effective germline-coded antibody lineage,  
368 which emerged precluding the convalescent phase of ZIKV infection. Germline-  
369 like somatic variants derived from ZK2B10 lineage neutralized ZIKV potently  
370 and protected mice from lethal challenge, while demonstrated no cross-  
371 reactivity with DENV2. The in-depth analyses showed that two site-  
372 mutagenesis of IGLV1-47 germline-coded  $\lambda$  chain, N31 and S91, are essential  
373 to the functional maturation of IGHV1-8/IGLV1-47 antibody lineage.

374 Two unique aspects of our study are worth highlighting here. One is based  
375 on the effective germline-coded antibody response represented by ZK2B10  
376 lineage. We report here that there was a significant increase in germline-like  
377 antibodies at Day 15 after the onset of symptoms. This drastic shift in repertoire  
378 composition was likely a result of rapid plasmablast response toward the end  
379 of the acute phase of ZIKV infection. Interestingly, this shift was coincided with  
380 the emergence of the ZK2B10 lineage, which provides a perfect introduction to  
381 understand the germline-coded antibody response during ZIKV natural  
382 infection. Similar patterns have been reported in separate antibody studies. For  
383 monoclonal antibodies, germline-like human mAbs, m301 and m302, were  
384 reported that target ZIKV E DIII cryptic epitopes (C-C' loop) and neutralize ZIKV  
385 potently both *in vitro* and *in vivo* [22]. Another human mAb, P1F12, originates  
386 from germline gene IGHV3-7 with an identity of 100% and neutralizes ZIKV  
387 potently as well [51]. For the overall B cell response, plasmablast-derived  
388 antibodies from ZIKV-infected, DENV-naïve donor showed low levels of SHM,  
389 supporting the mechanism of naïve B cell activation [19]. Lower IgG somatic  
390 hypermutation rates also reported during acute DENV infection, which is  
391 consistent with an innate-like antiviral recognition mediated by B cells using  
392 defined germline-coded B cell receptors [52]. Therefore, the inducing of  
393 germline-coded neutralizing antibodies occupies critical position in the B cell  
394 response during acute flavivirus infection. Diverse mechanisms of antibody  
395 lineage development were found in chronic infection, especially in HIV studies.

396 The initiation and early development of MPER-directed HIV antibody lineage  
397 have been reported to achieve high neutralizing breadth with low mutation from  
398 germline [53]. In a stark contrast, HIV-1 bNAbs VRC01 and PGT121, which  
399 target CD4 binding-site and V3 region respectively, require extensive mutation  
400 to achieve neutralizing breadth and potency and possess long HCDR3 loops  
401 to penetrate the glycan shield of the HIV-1 envelope spike [34, 44]. In summary,  
402 our longitudinal analysis of antibody repertoire and lineage development  
403 provides critical insights into the pathogenesis of ZIKV infection.

404 The other unique aspect of our study was the assist in the rational design  
405 of a safe and effective vaccine. As we previously reported that ZK2B10, as well  
406 as other E DIII-specific mAbs, are ZIKV-specific, potent neutralizing and  
407 protective in mice from a lethal ZIKV challenge [18, 23, 24, 30]. The identified  
408 epitope reveal that ZK2B10 bind to residues within the lateral ridge of DIII and  
409 blocks infection at a post-attachment step as other E DIII-specific potent  
410 neutralizing mAbs [31, 47]. Beyond that, DIII-specific antibodies give essential  
411 contribution to controlling ZIKV as they correlated positively with high  
412 neutralization titers and the depletion of them results in reduced neutralizing  
413 activity in ZIKV-infected patient serum [24, 47]. We also report here that only  
414 two site-mutagenesis of IGLV1-47 germline  $\lambda$  chain, N31 and S91, are  
415 sufficient for IGHV1-8/IGLV1-47 germline antibodies to achieve potent ZIKV  
416 neutralization. This barrier could overcome readily by an active B cell repertoire.  
417 The low degree of SHM observed for the ZK2B10 lineage suggests that

418 elicitation of naïve protective B cell response against ZIKV may be achievable  
419 with a standard vaccination regimen. Furthermore, E DIII-based vaccine has  
420 been reported to avert lethal West Nile virus (WNV) infection without enhancing  
421 ZIKV or DENV infectivity [54]. However, the low frequency and transient  
422 expansion of ZK2B10-like antibodies in the Pt1 repertoire suggest that  
423 overcoming the suboptimal immunogenicity of ZIKV E DIII, an elongated  
424 immunoglobulin-like domain, may prove to be a challenge for ZIKV vaccine  
425 development [55, 56].

## 426 **Materials and methods**

### 427 **Donor and PBMCs samples**

428 The blood samples were donated by a 28-year-old Chinese ZIKV convalescent  
429 male patient (Pt1) who traveled from Venezuela to the southern metropolitan  
430 city Guangzhou, China, in February, 2016 [6]. During his hospitalization and  
431 follow-up visits, a total of 7 sequential blood samples were collected on Day 4,  
432 Day 15, Month 2, Month 3, Month 6, Month 10 and Month 12 after the onset of  
433 the symptoms. Samples were separated into plasma and peripheral blood  
434 mononuclear cells (PBMCs) by centrifugation through a Ficoll-Hypaque  
435 gradient (GE Healthcare). PBMCs were cryopreserved in freezing media and  
436 stored in liquid nitrogen until further analysis by antibody repertoire sequencing.

### 437 **Sample preparation using 5'-RACE PCR**

438 An improved version of the 5'-RACE PCR protocol for sample preparation is

439 reported in a recent study [34, 44]. Here, total RNA was extracted from 1~5  
440 million PBMCs into 30ml of water with RNeasy Mini Kits (Qiagen, Valencia, CA).  
441 For unbiased repertoire analysis, 5'-RACE was performed with SMARTer  
442 RACE cDNA Amplification Kit (Clontech, Mountain View, CA). For ZK2B10  
443 gene-specific lineage analysis, reverse transcription (RT) was performed with  
444 SuperScript III (Life Technologies) and oligo (dT). In both cases, the cDNA was  
445 purified and eluted in 20ul of elution buffer (NucleoSpin PCR Clean-up Kit,  
446 Clontech). The immunoglobulin PCRs were set up with Platinum Taq High-  
447 Fidelity DNA Polymerase (Life Technologies, Carlsbad, CA) in a total volume  
448 of 50  $\mu$ l, with 5  $\mu$ l of cDNA as template, 1  $\mu$ l of 5'-RACE primer or gene-specific  
449 forward primers, and 1  $\mu$ l of 10  $\mu$ M reverse primer. To facilitate deep  
450 sequencing on the Ion GeneStudio S5 system, the forward primers (both 5'-  
451 RACE and gene-specific) contained a P1 adaptor, while the reverse primer  
452 contained an A adaptor and an Ion Xpress™ barcode (Life Technologies) to  
453 differentiate the libraries from various time points. A total of 25 cycles of PCRs  
454 were performed and the PCR products (~600 bp for 5'-RACE PCR or ~500 bp  
455 for gene-specific PCR) were gel purified (Qiagen, Valencia, CA). A degenerate  
456 primer (SAGGTGCAGCTGGTGCAGTCTGG) was used as the forward gene-  
457 specific primer to cover potential variations at the 5'-end of ZK2B10 transcripts.

#### 458 **Next-generation sequencing (NGS) and *Antibodyomics* analysis**

459 Antibody NGS has been adapted to the Ion GeneStudio S5 system [57]. Briefly,  
460 the antibody heavy and light ( $\kappa$  and  $\lambda$ ) chain libraries were quantitated using

461 Qubit® 2.0 Fluorometer with Qubit® dsDNA HS Assay Kits. Equal amounts of  
462 the heavy chain libraries from various time points were mixed and loaded onto  
463 an Ion 530 chip to increase the sequencing depth and to eliminate run-to-run  
464 variation. The  $\kappa$  and  $\lambda$  chain libraries at each time point were mixed at a ratio  
465 of 1:1 prior to library pooling and chip loading. Template preparation and (Ion  
466 530) chip loading was performed on the Ion Chef system using Ion 530 Ext  
467 Kits, followed by S5 sequencing with the default settings. Raw data was  
468 processed without 3'-end trimming in base calling to extend the read length.  
469 The human *Antibodyomics* pipeline version 1.0 [34, 39, 44] has been modified  
470 to improve data accuracy and computational efficiency [57]. This new  
471 *Antibodyomics* pipeline was used to process and annotate Pt1 antibody NGS  
472 data for repertoire profiling and lineage tracing. The distributions of germline  
473 genes, germline divergence or degree of somatic hypermutation (SHM), and  
474 CDR3 loop length derived from antibody NGS data as general repertoire  
475 profiles. The two-dimensional (2D) divergence/identity plots were constructed  
476 to visualize ZIKV-specific antibody lineages in the context of Pt1 antibody  
477 repertoire. A CDR3 identity of 95% was used as the cutoff for identifying  
478 sequences evolutionarily related to a reference antibody (shown as magenta  
479 dots on the 2D plots). The hierarchical clustering method was used to divide  
480 CDR3-defined somatic variants into groups based on an overall identity cutoff  
481 of 98% as previously described [34]. In addition to the dominant sequences, a  
482 consensus or a manually selected sequence was used as the group

483 representative for antibody synthesis and functional characterization. ZK2B10  
484 were initially isolated from PBMCs of Pt1 as we previously reported [24].

#### 485 **Human monoclonal antibody (mAb) clones construction, expression, and** 486 **purification**

487 All of the synthetic variable region genes of antibody heavy chain ( $V_H$ ) and light  
488 chain ( $V_{K/L}$ ) were analyzed using the IMGT/V-Quest server  
489 (<http://www.imgt.org/IMGIndex/V-QUEST.php>). They were cloned into the  
490 backbone of antibody expression vectors containing the constant regions of  
491 human IgG1 as previously described [50]. To produce full-length human mAbs,  
492 the recombinant clone was paired with the complementary chain of wild-type  
493 (WT) ZK2B10. The heavy and light chain expression plasmids were transiently  
494 co-transfected into HEK 293T cells for the production of full-length human IgGs,  
495 which were purified from the supernatant by affinity chromatography using  
496 protein A agarose (Thermo Scientific). The IgG concentration was determined  
497 using the BCA Protein Assay Kit (Thermo Scientific). We included previously  
498 reported MERS-CoV-specific mAb MERS-4 [50] for comparative analysis.

#### 499 **ZIKV E and ZIKV E DIII protein and ELISA analyses**

500 The genes of either E protein or E DIII protein (residues 301-403) of ZIKV  
501 (GZ01, KU820898) without tag were cloned into pET28a vectors (Novagen)  
502 and expressed by IPTG-induction in BL21 (RIL) bacterial cells. The isolated  
503 inclusion bodies were solubilized and re-folded as reported [55]. In ELISA

504 binding assays, the E proteins and E DIII proteins were captured separately  
505 onto ELISA plates overnight at 4 °C. Each tested mAb was serially diluted and  
506 applied to the ZIKV E and E DIII protein-captured ELISA plates. Binding  
507 activities were detected using anti-human IgG labeled with HRP and TMB  
508 substrate.

### 509 **Antibody neutralization assays**

510 All ZIKV GZ01 (KU820898), ZIKV MR766 (AY632535) and DENV2 43  
511 (AF204178) viruses were grown in C6/36 Aedes Albopictus cells and titrated  
512 on Vero cells before use. For neutralization assay, serial dilutions of mAbs were  
513 mixed with virus at 4 °C for 1 hour before being applied to Vero cells in the 6-  
514 well culture plates. After 1–2 hour of infection, the antibody-virus mixture was  
515 aspirated and Vero cells were washed with PBS and overlaid with DMEM  
516 containing 2% heat-inactivated FBS and 1% SeaPlaque Agarose (Lonza,  
517 50501). After 4–6 days, plaques were stained by 1% crystal violet and counted  
518 manually.

### 519 **Antibody prophylactic potential analyses in AG6 mice**

520 C57BL/6 mice deficient in interferon (IFN)  $\alpha$ ,  $-\beta$ , and  $-\gamma$  receptors (AG6 mice)  
521 were kindly provided by the Institute Pasteur of Shanghai, Chinese Academy  
522 of Sciences (IPS). The mice were bred and maintained in a pathogen-free  
523 animal facility. Groups of 4 sex-matched, 4- to 6-week-old AG6 mice were used  
524 for the animal studies. In prophylaxis assays, 300 $\mu$ g of each tested mAb or



525 isotype control (MERS-4) was administered via the i.p. route. The following day,  
526 the animals were challenged with  $10^4$  PFUs of ZIKV (GZ01 strain) via i.p.  
527 injection. Survival were monitored for up to 14 days post challenge. On days 5  
528 and 12 after challenge, whole blood was collected from each animal for ZIKV  
529 viral load measurement.

### 530 **Quantitative measurement of viral loads by TaqMan qPCR**

531 Whole blood (10  $\mu$ L) was collected in an RNase free Eppendorf tube containing  
532 lysis buffer (QIAGEN) and stored at  $-80^{\circ}\text{C}$  until use. Total RNA was extracted  
533 using RNeasy Mini Kits (74106, QIAGEN) and reverse-transcribed into cDNA  
534 using iScript cDNA Synthesis Kits (170-8890, Bio-Rad). Viral RNA copies were  
535 quantified through TaqMan qPCR amplification of ZIKV (GZ01) envelope gene.  
536 Measurements were expressed as  $\log_{10}$  viral RNA copies per millimeter  
537 calculated against a standard curve. Sequences for primers and probes were  
538 as follows: ZIKV-F CCGCTGCCCAACACAAG, ZIKV-R  
539 CCACTAACGTTCTTTTGCAGACAT, ZIKV-probe  
540 AGCCTACCTTGACAAGCARTCAGACACTCAA (5'FAM, 3'TAMRA)

### 541 **Multiple sequence alignment and structural analysis**

542 Multiple sequence alignment (MSA) was calculated using BioEdit ClustalW.  
543 The crystal structure of ZIKV DIII-ZK2B10 Fab complex has been determined  
544 and analyzed here to identify the 'hotspot' residues critical to ZK2B10 lineage  
545 development [31]. For the intermolecular interactions shown in Fig 5, 4 Å was

546 used as the maximal cut-off distance for hydrogen bonds. Illustrations of  
547 structural models were prepared using PyMOL Molecular Graphics System  
548 1.5.0.4.

#### 549 **Statistical methods**

550 All data were analyzed using Prism6 software (GraphPad). The half-maximal  
551 effective concentrations ( $EC_{50}$ ) were calculated using the dose-response  
552 stimulation model. The  $IC_{50}$  value for each mAb was calculated using the dose-  
553 response inhibition model. For experiments involving AG6 mice, 4 animals  
554 were included in each assessment group to ensure equal representation and  
555 consistency of the data obtained. Statistical evaluation was performed using  
556 Student's unpaired t test. Data were presented as mean  $\pm$  SEM. \* $p < 0.05$ ; \*\* $p$   
557  $< 0.01$ ; and \*\*\* $p < 0.001$ .

#### 558 **Ethics statement**

559 The human study was approved by the Ethical Committee of the Guangzhou  
560 Eighth People's Hospital, Guangzhou Medical University. The research was  
561 conducted in strict accordance with the Chinese government rules and  
562 regulations for the protection of human subjects. The study subjects provided  
563 the written informed consents for research use of their blood samples. All  
564 procedures with animals were undertaken according to Experimental Animal  
565 Welfare and Ethics Committee of Tsinghua University. All experiments were  
566 performed under the guidelines of the Experimental Animal Welfare and Ethics

567 Committee of Tsinghua University (16-ZLQ9).

## 568 **Acknowledgements**

569 We are grateful to the ZIKV convalescent patient for donating his blood samples  
570 from which mAbs were isolated and Drs. Jiang Wang, Wenxin Hong, and  
571 Lingzhai Zhao for providing the patient with treatment and care. We thank Drs.  
572 Cheng-Feng Qin and Gong Cheng for providing the Zika virus isolate GZ01 and  
573 MR766. We are also grateful for Institute Pasteur of Shanghai, Chinese  
574 Academy of Sciences for kindly providing AG6 mice.

## 575 **Author contributions**

576 Project design by F.G., X.L., L.Z., J.Z, L.Y.; sample preparation by F.G. and  
577 L.Z.; library preparation and NGS by L.H.; data processing and annotation by  
578 X.L. and J.Z.; antibody lineage tracing by X.L. and J.Z.; antibody sequence  
579 selection by F.G., X.L., and J.Z.; antibody synthesis by F.G. and L.Z.; antigen  
580 binding and neutralization assays by F.G. and L.Z.; ZIKV challenge and  
581 protection in mice by F.G. and L.Z.; manuscript written by F.G., L.Z., J.Z., and  
582 L.Y.

## 583 **Declaration of interests**

584 The authors declare that they have no competing interests.

## 585 **Reference**

586 1. Miner JJ, Diamond MS. Zika virus pathogenesis and tissue tropism. Cell  
587 Host Microbe. 2017;21(2):134-42. doi: 10.1016/j.chom.2017.01.004.

- 588 2. Dick GWA, Kitchen SF, Haddock AJ. Zika virus (I). isolations and serological  
589 specificity. *Trans R Soc Trop Med Hyg.* 1952;46(5):509-20.
- 590 3. Petersen LR, Jamieson DJ, Powers AM, Honein MA. Zika virus. *N Engl J*  
591 *Med.* 2016;374(16):1552-63. doi: 10.1056/NEJMra1602113.
- 592 4. Weaver SC, Costa F, Garcia-Blanco MA, Ko AI, Ribeiro GS, Saade G, et  
593 al. Zika virus: history, emergence, biology, and prospects for control. *Antiviral*  
594 *Res.* 2016;130:69-80. doi: 10.1016/j.antiviral.2016.03.010.
- 595 5. Wikan N, Smith DR. Zika virus: history of a newly emerging arbovirus.  
596 *Lancet Infect Dis.* 2016;16(7):e119-e26. doi: 10.1016/S1473-3099(16)30010-  
597 X.
- 598 6. Zhang FC, Li XF, Deng YQ, Tong YG, Qin CF. Excretion of infectious Zika  
599 virus in urine. *Lancet Infect Dis.* 2016;16(6):641-2. doi: 10.1016/S1473-  
600 3099(16)30070-6.
- 601 7. Brasil P, Pereira JJ, Moreira M, Ribeiro NR, Damasceno L, Wakimoto M, et  
602 al. Zika virus infection in pregnant women in Rio de Janeiro. *N Engl J Med.*  
603 2016;375(24):2321-34. doi: 10.1056/NEJMoa1602412.
- 604 8. França GVA, Schuler-Faccini L, Oliveira WK, Henriques CMP, Carmo EH,  
605 Pedi VD, et al. Congenital Zika virus syndrome in Brazil: a case series of the  
606 first 1501 livebirths with complete investigation. *Lancet.* 2016;388(10047):891-  
607 7. doi: 10.1016/S0140-6736(16)30902-3.
- 608 9. Rasmussen SA, Jamieson DJ, Honein MA, Petersen LR. Zika virus and  
609 birth defects-reviewing the evidence for causality. *N Engl J Med.*

- 610 2016;374(20):1981-7. doi: 10.1056/NEJMs1604338.
- 611 10. Oehler E, Watrin L, Larre P, Leparc-Goffart I, Lastère S, Valour F, et al.  
612 Zika virus infection complicated by Guillain-Barré syndrome – case report,  
613 French Polynesia, December 2013. *Eurosurveillance*. 2014;19(9):20720. doi:  
614 10.2807/1560-7917.ES2014.19.9.20720.
- 615 11. Lessler J, Chaisson L, Kucirka L, Bi Q, Grantz K, Salje H, et al. Assessing  
616 the global threat from Zika virus. *Science*. 2016;353(6300):aaf8160. doi:  
617 10.1126/science.aaf8160.
- 618 12. Dowd KA, Pierson TC. Antibody-mediated neutralization of flaviviruses: a  
619 reductionist view. *Virology*. 2011;411(2):306-15. doi:  
620 10.1016/j.virol.2010.12.020.
- 621 13. Fernandez E, Dejnirattisai W, Cao B, Scheaffer SM, Supasa P, Wongwiwat  
622 W, et al. Human antibodies to the dengue virus E-dimer epitope have  
623 therapeutic activity against Zika virus infection. *Nat Immunol*.  
624 2017;18(11):1261-9. doi: 10.1038/ni.3849.
- 625 14. Heinz FX, Stiasny K. The antigenic structure of Zika virus and its relation to  
626 other flaviviruses: implications for infection and immunoprophylaxis. *Microbiol  
627 Mol Biol Rev*. 2017;81(1):e00055-16. doi: 10.1128/MMBR.00055-16.
- 628 15. Magnani DM, Rogers TF, Beutler N, Ricciardi MJ, Bailey VK, Gonzalez-  
629 Nieto L, et al. Neutralizing human monoclonal antibodies prevent Zika virus  
630 infection in macaques. *Sci Transl Med*. 2017;9(410):pii: eaan8184. doi:  
631 10.1126/scitranslmed.aan8184.

- 632 16. Pierson T, C., Graham B, S. Zika virus: immunity and vaccine development.  
633 Cell. 2016;167(3):625-31. doi: 10.1016/j.cell.2016.09.020.
- 634 17. Pierson TC, Diamond MS. Molecular mechanisms of antibody-mediated  
635 neutralisation of flavivirus infection. Expert Rev Mol Med. 2008;10:e12. Epub  
636 05/01. doi: 10.1017/S1462399408000665.
- 637 18. Robbiani D, Bozzacco L, Keeffe J, Khouri R, Olsen P, Gazumyan A, et al.  
638 Recurrent potent human neutralizing antibodies to Zika virus in Brazil and  
639 Mexico. Cell. 2017;169(4):597-609. doi: 10.1016/j.cell.2017.04.024.
- 640 19. Rogers TF, Goodwin EC, Briney B, Sok D, Beutler N, Strubel A, et al. Zika  
641 virus activates de novo and cross-reactive memory B cell responses in dengue-  
642 experienced donors. Sci Immunol. 2017;2(14):pii: ean6809. doi:  
643 10.1126/sciimmunol.aan6809.
- 644 20. Stettler K, Beltramello M, Espinosa D, Graham V, Cassotta A, Bianchi S, et  
645 al. Specificity, cross-reactivity, and function of antibodies elicited by Zika virus  
646 infection. Science. 2016;353(6301):823-6. doi: 10.1126/science.aaf8505.
- 647 21. Wang Q, Yang H, Liu X, Dai L, Ma T, Qi J, et al. Molecular determinants of  
648 human neutralizing antibodies isolated from a patient infected with Zika virus.  
649 Sci Transl Med. 2016;8(369):369ra179. doi: 10.1126/scitranslmed.aai8336.
- 650 22. Wu Y, Li S, Du L, Wang C, Peng Z, Hong B, et al. Neutralization of Zika  
651 virus by germline-like human monoclonal antibodies targeting cryptic epitopes  
652 on envelope domain III. Emerg Microbes Infect. 2017;6(10):e89. doi:  
653 10.1038/emi.2017.79.

- 654 23. Zhao H, Fernandez E, Dowd K, Speer S, Platt D, Gorman M, et al.  
655 Structural basis of Zika virus-specific antibody protection. *Cell*.  
656 2016;166(4):1016-27. doi: 10.1016/j.cell.2016.07.020.
- 657 24. Yu L, Wang R, Gao F, Li M, Liu J, Wang J, et al. Delineating antibody  
658 recognition against Zika virus during natural infection. *JCI Insight*.  
659 2017;2(12):pii: 93042. doi: 10.1172/jci.insight.93042.
- 660 25. Barba-Spaeth G, Dejnirattisai W, Rouvinski A, Vaney MC, Medits I, Sharma  
661 A, et al. Structural basis of potent Zika-dengue virus antibody cross-  
662 neutralization. *Nature*. 2016;536(7614):48-53. doi: 10.1038/nature18938.
- 663 26. Sapparapu G, Fernandez E, Kose N, Cao B, Fox JM, Bombardi RG, et al.  
664 Neutralizing human antibodies prevent Zika virus replication and fetal disease  
665 in mice. *Nature*. 2016;540(7633):443-7. doi: 10.1038/nature20564.
- 666 27. Hasan SS, Miller A, Sapparapu G, Fernandez E, Klose T, Long F, et al. A  
667 human antibody against Zika virus crosslinks the E protein to prevent infection.  
668 *Nat Commun*. 2017;8:14722. doi: 10.1038/ncomms14722.
- 669 28. Rouvinski A, Guardado Calvo P, Barba Spaeth G, Duquerroy S, Vaney M-  
670 C, Kikuti CM, et al. Recognition determinants of broadly neutralizing human  
671 antibodies against dengue viruses. *Nature*. 2015;520(7545):109-13. doi:  
672 10.1038/nature14130.
- 673 29. Dejnirattisai W, Wongwiwat W, Supasa S, Zhang X, Dai X, Rouvinski A, et  
674 al. A new class of highly potent, broadly neutralizing antibodies isolated from  
675 viremic patients infected with dengue virus. *Nat Immunol*. 2015;16(5):170-7. doi:

- 676 10.1038/ni.3058. .
- 677 30. Li C, Gao F, Yu L, Wang R, Jiang Y, Shi X, et al. A single injection of human  
678 neutralizing antibody protects against Zika virus infection and microcephaly in  
679 developing mouse embryos. *Cell Rep.* 2018;23(5):1424-34. doi:  
680 10.1016/j.celrep.2018.04.005.
- 681 31. Wang L, Wang R, Wang L, Ben H, Yu L, Gao F, et al. Structural basis for  
682 neutralization and protection by a Zika virus-specific human antibody. *Cell Rep.*  
683 2019;26(12):3360-8.e5. doi: 10.1016/j.celrep.2019.02.062.
- 684 32. Abbink P, Stephenson KE, Barouch DH. Zika virus vaccines. *Nat Rev*  
685 *Microbiol.* 2018;16(10):594-600. doi: 10.1038/s41579-018-0039-7.
- 686 33. Abbasi J. Zika vaccine enters clinical trials. *JAMA.* 2016;316(12):1249. doi:  
687 10.1001/jama.2016.12760.
- 688 34. He L, Sok D, Azadnia P, Hsueh J, Landais E, Simek M, et al. Toward a  
689 more accurate view of human B-cell repertoire by next-generation sequencing,  
690 unbiased repertoire capture and single-molecule barcoding. *Sci Rep.*  
691 2014;4:6778. doi: 10.1038/srep06778.
- 692 35. He L, Lin X, De VN, Saye-Francisco KL, Mann CJ, Augst R, et al. Hidden  
693 Lineage Complexity of Glycan-Dependent HIV-1 Broadly Neutralizing  
694 Antibodies Uncovered by Digital Panning and Native-Like gp140 Trimer. *Front*  
695 *Immunol.* 2017;8.
- 696 36. Koff WC, Burton DR, Johnson PR, Walker BD, King CR, Nabel GJ, et al.  
697 Accelerating next-generation vaccine development for global disease



- 698 prevention. *Science*. 2013;340(6136):1232910. doi: 10.1126/science.1232910.
- 699 37. Georgiou G, Ippolito GC, Beausang J, Busse CE, Wardemann H, Quake  
700 SR. The promise and challenge of high-throughput sequencing of the antibody  
701 repertoire. *Nat Biotechnol*. 2014;32(2):158-68. doi: 10.1038/nbt.2782.
- 702 38. Koff WC, Gust ID, Plotkin SA. Toward a human vaccines project. *Nat*  
703 *Immunol*. 2014;15(7):589-92. doi: 10.1038/ni.2871.
- 704 39. Wu X, Zhou T, Zhu J, Zhang B, Georgiev I, Wang C, et al. Focused  
705 evolution of HIV-1 neutralizing antibodies revealed by structures and deep  
706 sequencing. *Science*. 2011;333(6049):1593-602. doi:  
707 10.1126/science.1207532.
- 708 40. Wu X, Zhang Z, Schramm CA, Joyce MG, Kwon YD, Tongqing Z, et al.  
709 Maturation and diversity of the VRC01-antibody lineage over 15 years of  
710 chronic HIV-1 infection. *Cell*. 2015;161(3):470-85. doi:  
711 10.1016/j.cell.2015.03.004.
- 712 41. Sok D, Pauthner M, Briney B, Lee JH, Saye-Francisco KL, Hsueh J, et al.  
713 A prominent site of antibody vulnerability on HIV envelope incorporates a motif  
714 associated with CCR5 binding and its camouflaging glycans. *Immunity*.  
715 2016;45(1):31-45. doi: 10.1016/j.immuni.2016.06.026.
- 716 42. Zhu J, O'Dell S, Ofek G, Pancera M, Wu X, Zhang B, et al. Somatic  
717 populations of PGT135-137 HIV-1-neutralizing antibodies identified by 454  
718 pyrosequencing and bioinformatics. *Front Microbiol*. 2012;3(1):315. doi:  
719 10.3389/fmicb.2012.00315.

- 720 43. Dai K, He L, Khan SN, O'Dell S, McKee K, Tran K, et al. Rhesus macaque  
721 B-cell responses to an HIV-1 trimer vaccine revealed by unbiased longitudinal  
722 repertoire analysis. *mBio*. 2015;6(6):e01375-15. doi: 10.1128/mBio.01375-15.
- 723 44. Kong L, Ju B, Chen Y, He L, Ren L, Liu J, et al. Key gp120 glycans pose  
724 roadblocks to the rapid development of VRC01-class antibodies in an HIV-1-  
725 infected Chinese donor. *Immunity*. 2016;44(4):939-50. doi:  
726 10.1016/j.immuni.2016.03.006.
- 727 45. Zhu J, Ofek G, Yang Y, Zhang B, Louder MK, Lu G, et al. Mining the  
728 antibodyome for HIV-1-neutralizing antibodies with next-generation sequencing  
729 and phylogenetic pairing of heavy/light chains. *Proc Natl Acad Sci USA*.  
730 2013;110(16):6470-5. doi: 10.1073/pnas.1219320110.
- 731 46. Zhu J, Wu X, Zhang B, Mc Kee K, O'Dell S, Soto C, et al. De novo  
732 identification of VRC01 class HIV-1-neutralizing antibodies by next-generation  
733 sequencing of B-cell transcripts. *Proc Natl Acad Sci USA*. 2013;110(43):E4088-  
734 E97. doi: 10.1073/pnas.1306262110.
- 735 47. Pierson TC, Diamond MS. The emergence of Zika virus and its new clinical  
736 syndromes. *Nature*. 2018;560(7720):573-81. doi: 10.1038/s41586-018-0446-y.
- 737 48. Orozco S, Schmid MA, Parameswaran P, Lachica R, Henn MR, Beatty R,  
738 et al. Characterization of a model of lethal dengue virus 2 infection in C57BL/6  
739 mice deficient in the alpha/beta interferon receptor. *J Gen Virol*.  
740 2012;93(10):2152-7. doi: 10.1099/vir.0.045088-0.
- 741 49. Liu J, Liu Y, Nie K, Du S, Qiu J, Pang X, et al. Flavivirus NS1 protein in

742 infected host sera enhances viral acquisition by mosquitoes. *Nat Microbiol.*  
743 2016;1(9):16087. doi: 10.1038/nmicrobiol.2016.87.

744 50. Jiang L, Wang N, Zuo T, Shi X, Poon K-MV, Wu Y, et al. Potent  
745 neutralization of MERS-CoV by human neutralizing monoclonal antibodies to  
746 the viral spike glycoprotein. *Sci Transl Med.* 2014;6(234):234ra59. doi:  
747 10.1126/scitranslmed.3008140.

748 51. Magnani DM, Cgt S, Rosen BC, Ricciardi MJ, Pedreño-Lopez N, Gutman  
749 MJ, et al. A human inferred germline antibody binds to an immunodominant  
750 epitope and neutralizes Zika virus. *PLoS Negl Trop Dis.* 2017;11(6):e0005655.  
751 doi: 10.1371/journal.pntd.0005655.

752 52. Godoy-Lozano E, Téllez-Sosa J, Sánchez-González G, Sámano-Sánchez  
753 H, Aguilar-Salgado A, Salinas-Rodríguez A, et al. Lower IgG somatic  
754 hypermutation rates during acute dengue virus infection is compatible with a  
755 germinal center-independent B cell response. *Genome Med.* 2016;8(1):23. doi:  
756 10.1186/s13073-016-0276-1.

757 53. Krebs SJ, Kwon YD, Schramm CA, Law WH, Donofrio G, Zhou KH, et al.  
758 Longitudinal analysis reveals early development of three MPER-directed  
759 neutralizing antibody lineages from an HIV-1-infected individual. *Immunity.*  
760 2019;50(3):677-91.e13. doi: 10.1016/j.immuni.2019.02.008.

761 54. Lai H, Paul AM, Sun H, He J, Yang M, Bai F, et al. A plant-produced vaccine  
762 protects mice against lethal West Nile virus infection without enhancing Zika or  
763 dengue virus infectivity. *Vaccine.* 2018;36(14):1846-52. doi:

764 10.1016/j.vaccine.2018.02.073.

765 55. Dai L, Song J, Lu X, Deng YQ, Musyoki AM, Cheng H, et al. Structures of  
766 the Zika virus envelope protein and its complex with a flavivirus broadly  
767 protective antibody. *Cell Host Microbe*. 2016;19(5):696-704. doi:  
768 10.1016/j.chom.2016.04.013.

769 56. Sirohi D, Chen Z, Sun L, Klose T, Pierson TC, Rossmann MG, et al. The  
770 3.8 Å resolution cryo-EM structure of Zika virus. *Science*. 2016;352(6284):467-  
771 70. doi: 10.1126/science.aaf5316.

772 57. He L, Lin X, de Val N, Saye-Francisco KL, Mann CJ, Augst R, et al. Hidden  
773 lineage complexity of glycan-dependent HIV-1 broadly neutralizing antibodies  
774 uncovered by digital panning and native-like gp140 trimer. *Front Immunol*.  
775 2017;8:1025. doi: 10.3389/fimmu.2017.01025.

776

## 777 **Figure captions**

778 **Fig 1. Unbiased antibody repertoire profiles of Pt1 across ZIKV natural**  
779 **infection**

780 **(A)** Schematic view of unbiased antibody repertoire analysis and ZK2B10  
781 lineage tracing. PBMC samples from Pt1 were collected at 7 sequential time  
782 points after the onset of symptoms. 5'-RACE PCR was used to prepare  
783 antibody chain libraries for long-read (600 bp) next-generation sequencing  
784 (NGS) on the Ion GeneStudio S5 platform. The *Antibodyomics* 2.0 pipeline was  
785 used to process the NGS data for antibody repertoire profiling, while CDR3-

786 based identification was used for ZK2B10 lineage tracing. Representative  
787 somatic variants were synthesized for functional characterizations. **(B-D)**  
788 Distributions were plotted for (B) germline V gene usage, (C) germline  
789 divergence, and (D) CDR3 loop length for heavy chains (left panel),  $\kappa$  chains  
790 (middle panel), and  $\lambda$  chains (right panel). Color coding denotes the 7  
791 sequential time points with Day 4 shown in gray, Day 15 in red, Month 2 in  
792 orange, Month 3 in sky blue, Month 6 in green, Month 10 in purple, and Month  
793 12 in black. The germline V genes used by ZK2B10 (IGHV1-8 and IGLV1-47)  
794 are labelled in red.

795 **Fig 2. Lineage tracing of ZK2B10 across ZIKV natural infection**

796 **(A)** Lineage tracing of ZK2B10 heavy chain in unbiased amplified library (upper  
797 panel) and in ZK2B10-specific amplified library (lower panel). **(B)** Lineage  
798 tracing of ZK2B10  $\lambda$  chain in unbiased amplified library. For each time point,  
799 the repertoire is shown as a two-dimensional (2D) plot, with the X-axis  
800 indicating the germline divergence of NGS-derived antibody sequences and  
801 the Y-axis for their identity with respect to ZK2B10 heavy or  $\lambda$  chain. Color  
802 coding indicates the sequence density on the 2D plots ranging from  $10^1$  to  $10^8$ .  
803 ZK2B10 heavy or  $\lambda$  chain is shown as block dots on the 2D plots. CDR3-defined  
804 somatic variants that evolutionarily related to ZK2B10 heavy or  $\lambda$  chain are  
805 shown as magenta dots, with their total number labeled on the 2D plots. HC for  
806 heavy chain and LC for  $\lambda$  chain. **(C-D)** Neighbor-joining tree (MEGA6.0)  
807 depicting the relationship between germline sequence and the representative

808 somatic variants from ZK2B10 (C) heavy chain and (D)  $\lambda$  chain. Individual  
809 variants are named at the branch end point, alongside with their germline  
810 identity. Branch lengths are drawn to scale so that the relations between  
811 different nucleotide sequences can readily assessed. Color-coding of triangle  
812 indicates their emerging time during infection.

813 **Fig 3. Sequence alignment of representative somatic variants of ZK2B10**

814 **(A-B)** Sequence alignment of representative ZK2B10 (A) heavy chain and (B)  
815  $\lambda$  chain somatic variants with CDR regions highlighted. Residues directly bind  
816 to ZIKV E DIII were colored in blue according to the crystal structure of ZK2B10  
817 and ZIKV E DIII complex [31]. The identified potential critical residues for  
818 ZK2B10 maturation are marked in red.

819 **Fig 4. Summary of somatic variants of the ZK2B10 antibody lineage**

820 **(A-B)** ZK2B10 somatic variants are listed with the sampling time point, genetic  
821 characterizations, sequencing read frequency ( $N_{\text{read}}$ ), expression yield, and  
822 functional characterizations. (A) 16 representative ZK2B10 heavy chain  
823 variants and (B) 11 representative ZK2B10  $\lambda$  chain variants identified from the  
824 Day 15 and Month 3 antibody repertoires.  $EC_{50}$  represents the half-maximal  
825 effective concentrations for ELISA binding assays.  $IC_{50}$  represents the half-  
826 maximal inhibitory concentrations for plaque neutralization assays. **(C-G)** For  
827 *in vivo* protection, prophylactic potential against ZIKV infection in AG6 mice  
828 was tested. Shown here: (C) timeline for mAb injection, ZIKV inoculation, and

829 blood collection. The prophylactic potential of mAbs was assessed by  
830 monitoring survival rates for representative (D) heavy and (E)  $\lambda$  chain somatic  
831 variants of ZK2B10 up to 14 days post challenge, and ZIKV RNA copies in  
832 blood for (F) heavy and (G)  $\lambda$  chain variants of ZK2B10 on 5 days and 12 days  
833 post challenge. Single measurement of ZIKV RNA copies in blood showed  
834 distinct results among study groups. Four animals were used in each group. All  
835 data are presented as mean  $\pm$  SEM. \* $p < 0.05$ ; \*\* $p < 0.01$ ; \*\*\* $p < 0.001$ ; ns, no  
836 significant.

837 **Fig 5. Mutagenesis and structural analyses of critical residues for ZK2B10**  
838 **maturation**

839 **(A)** Validation of ZK2B10 heavy chain critical residues by reverse mutagenesis.  
840 **(B)** Validation of ZK2B10  $\lambda$  chain critical residues by mutagenesis. **(C)** The  
841 contact interface of ZK2B10 heavy chain (HC) with ZIKV E DIII. In the ribbon  
842 diagram, the ZK2B10 HC is shown in magenta and ZIKV E DIII in cornflower  
843 blue. Residues directly involved in the contact interface with E DIII (Y111, Y114,  
844 Y116 and Y118) are shown with side chain. The identified critical residues, D39  
845 on HCDR1, is highlighted in yellow. **(D)** Contact interface of ZK2B10  $\lambda$  chain  
846 (LC) with ZIKV E DIII. ZK2B10 LC is shown in forest green and ZIKV E DIII in  
847 cornflower blue. Residues directly involved in the contact interface with E DIII  
848 (N31, N32, Y33, R51, D94 and L96) are shown with side chain. The identified  
849 critical residues, N31 on LCDR1 and S91 on LCDR3, are highlighted in yellow.

## 850 **Supporting information captions**

851 **S1 Fig. Strategy for Next Generation Sequencing and CDR3-based**  
852 **lineage tracing.** To facilitate NGS, 5' RACE PCR was used for unbiased  
853 antibody repertoire analysis, while ZK2B10 heavy chain specific amplification  
854 primer was for ZK2B10 HC lineage tracing. The forward primers contained a  
855 trP/P1 adaptor, while reverse primer contained an A adaptor and a N<sub>10</sub> barcode  
856 to differentiate the libraries of various time points. To improve data accuracy,  
857 the raw sequences of antibody heavy chain or light ( $\kappa/\lambda$ ) chain variable regions  
858 were processed separately by *Antibodyomics* pipeline. After CDR3-based  
859 identification, somatic variants with 95% or greater CDR3 identity on nucleotide  
860 level were defined for lineage tracings. Representative somatic variants were  
861 synthesized for full-length human IgG1 production followed by further *in vitro*  
862 and *in vivo* functional assays.

863 **S2 Fig. Distribution of germline divergence in each V gene germline of**  
864 **Pt1 across ZIKV natural infection.** Distributions were plotted for the germline  
865 divergence in each V gene germline of heavy chains (left panel),  $\kappa$  chains  
866 (middle panel) and  $\lambda$  chains (right panel). Color coding denotes the 7 sequential  
867 time points with Day 4 shown in gray, Day 15 in red, Month 2 in orange, Month  
868 3 in sky blue, Month 6 in green, Month 10 in purple, and Month 12 in black.

869 **S1 Table. Next-generation sequencing (NGS) of antibody repertoires of a**  
870 **ZIKV-infected Chinese patient.**



Fig 1

A

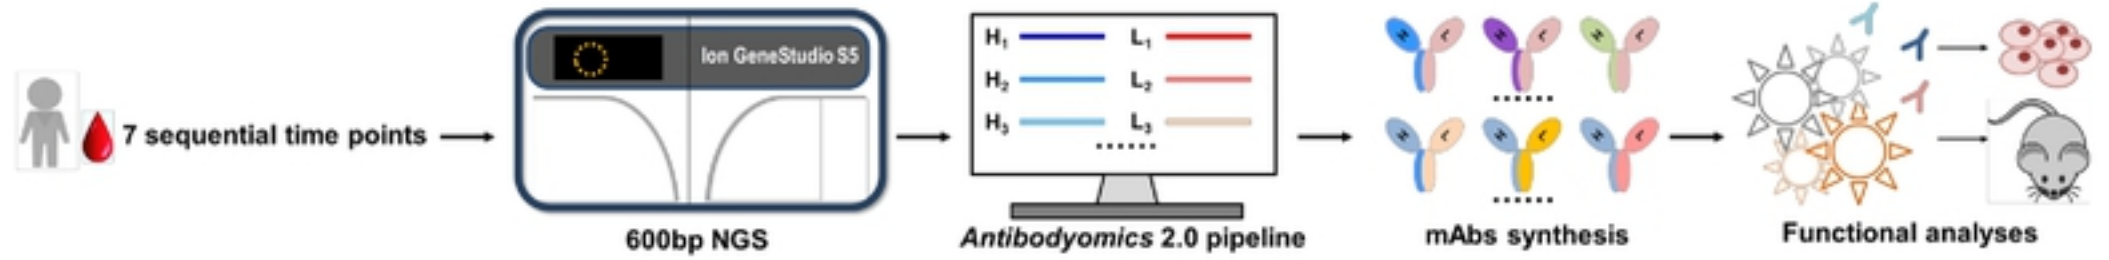

B

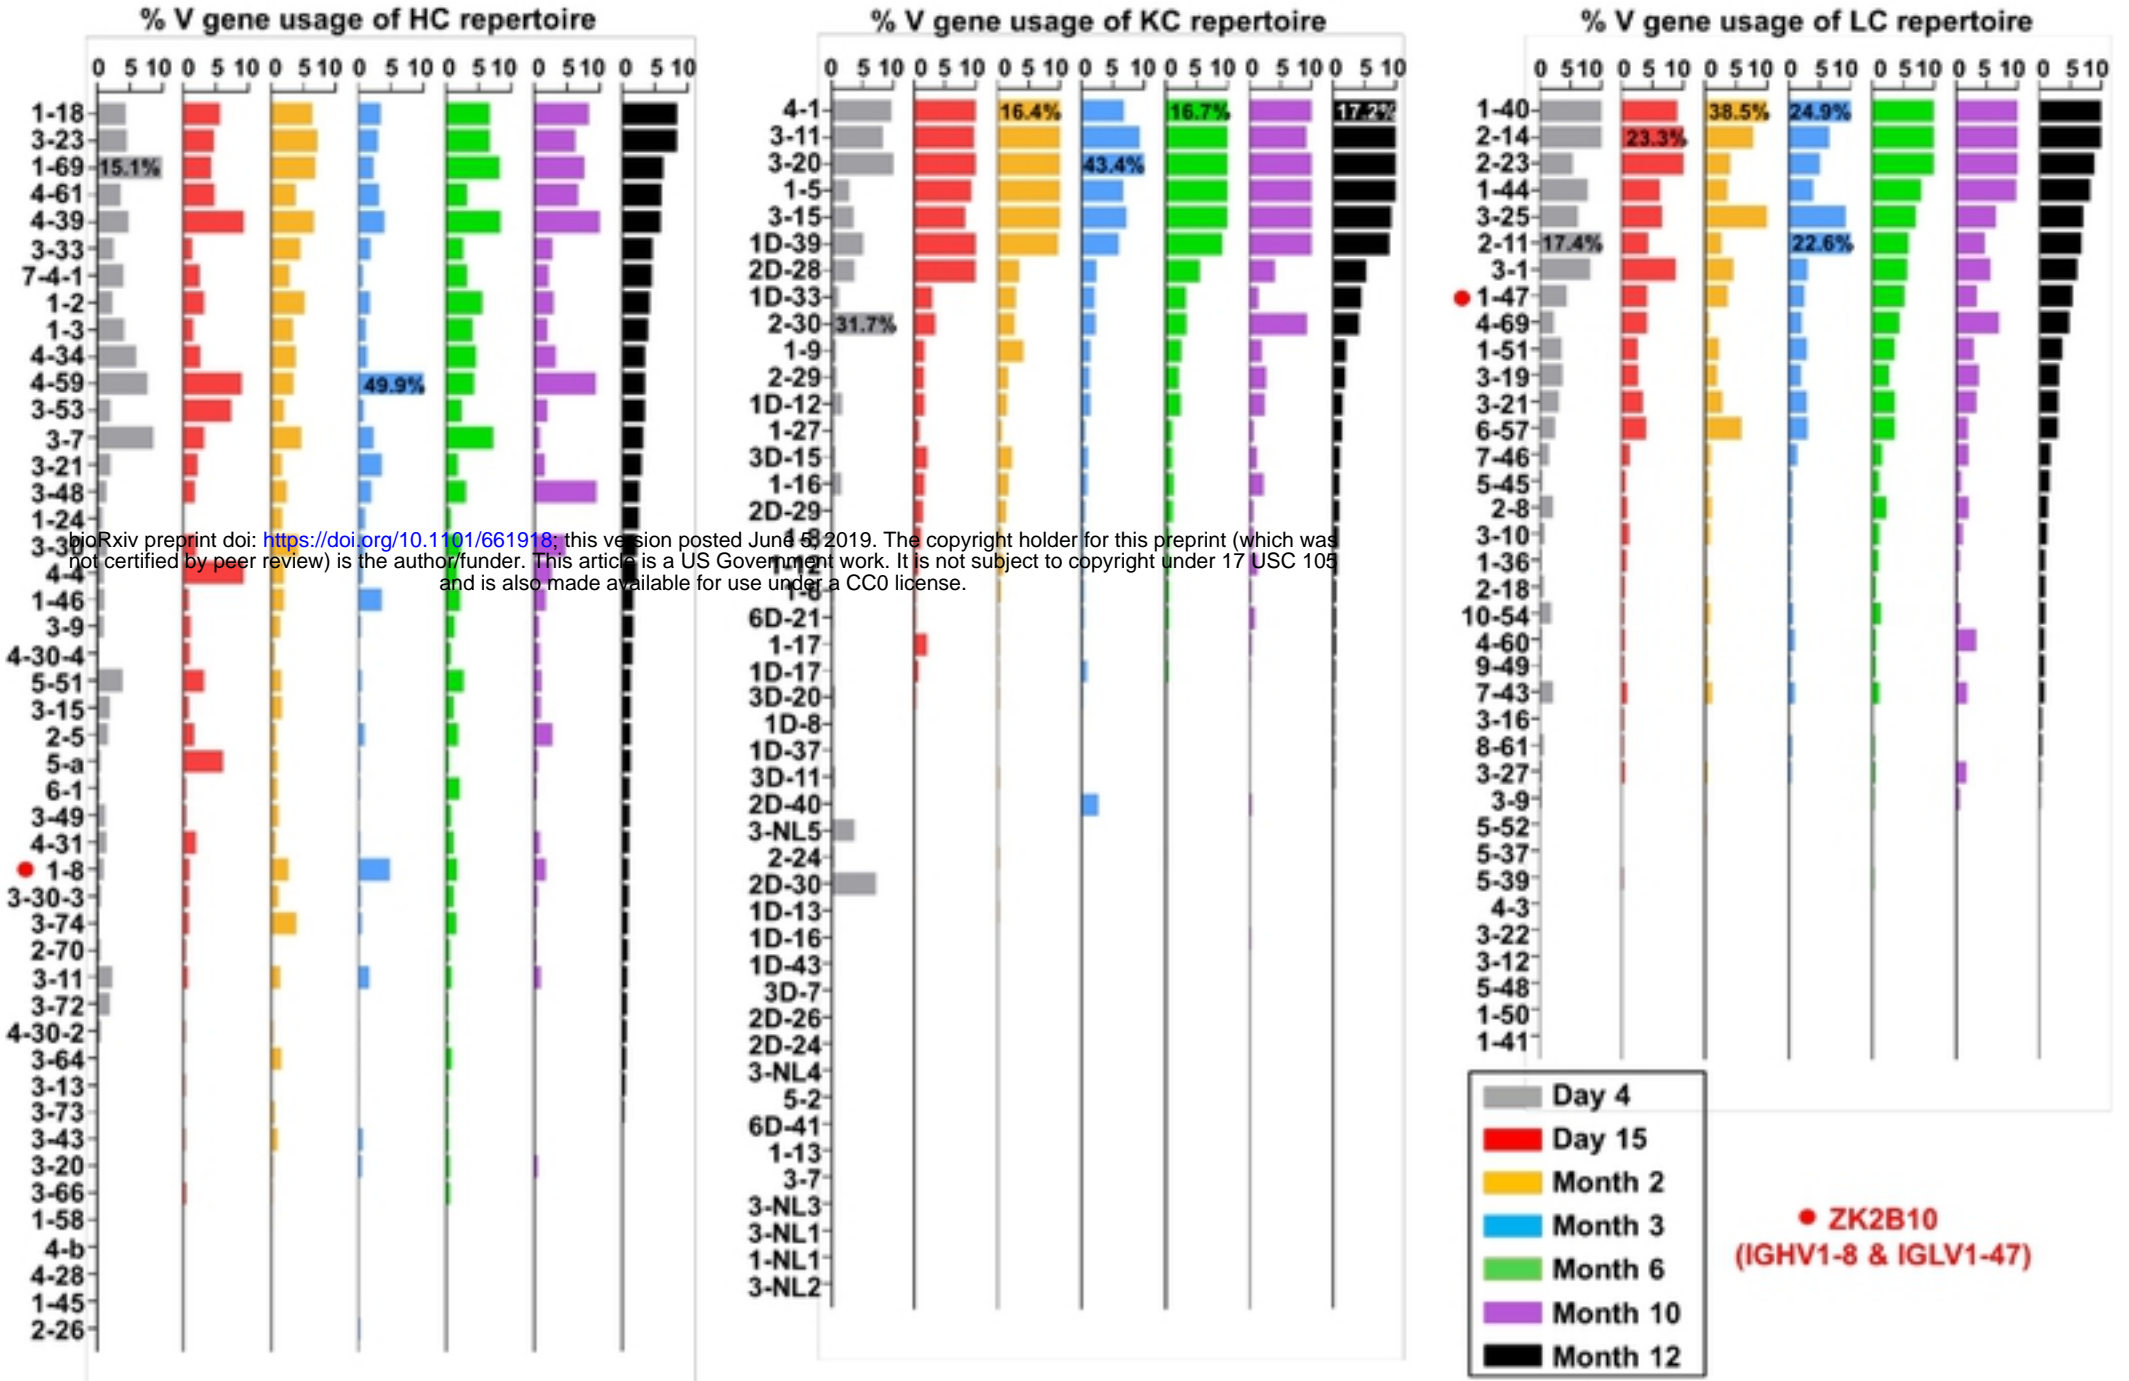

C

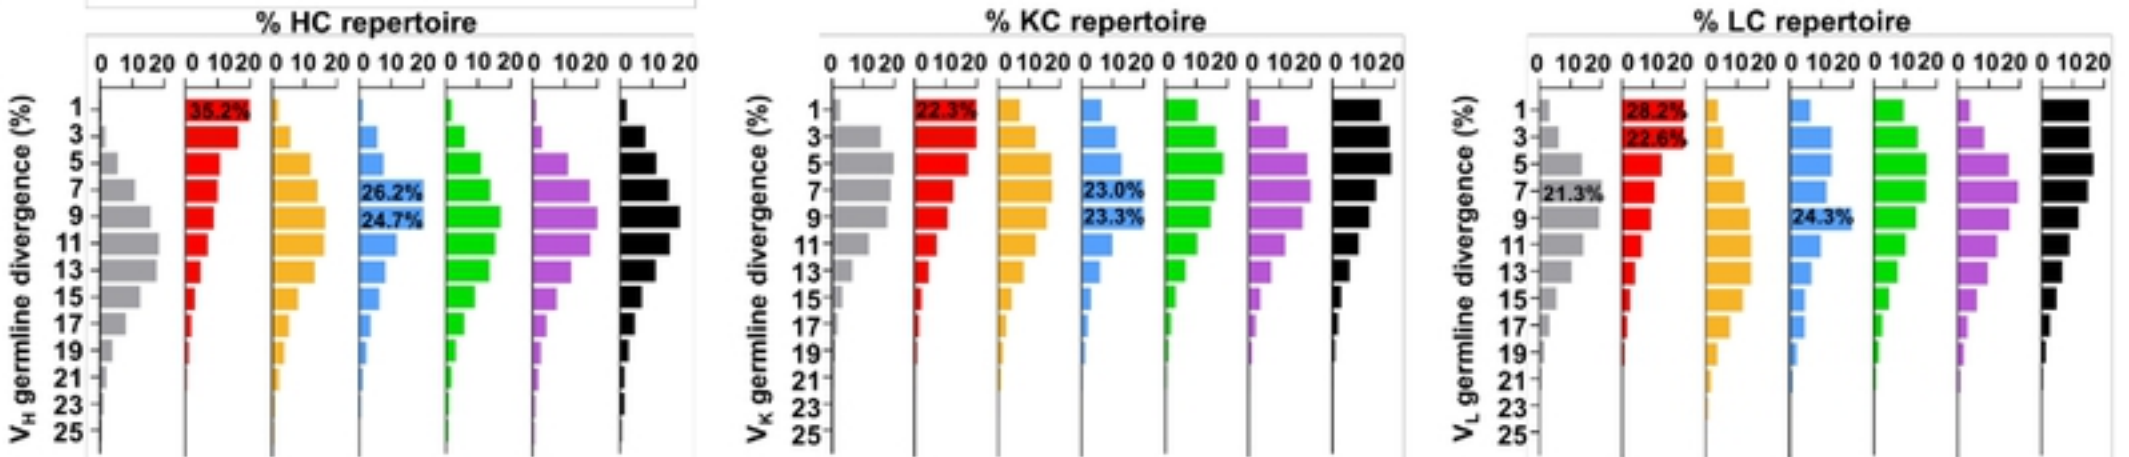

D

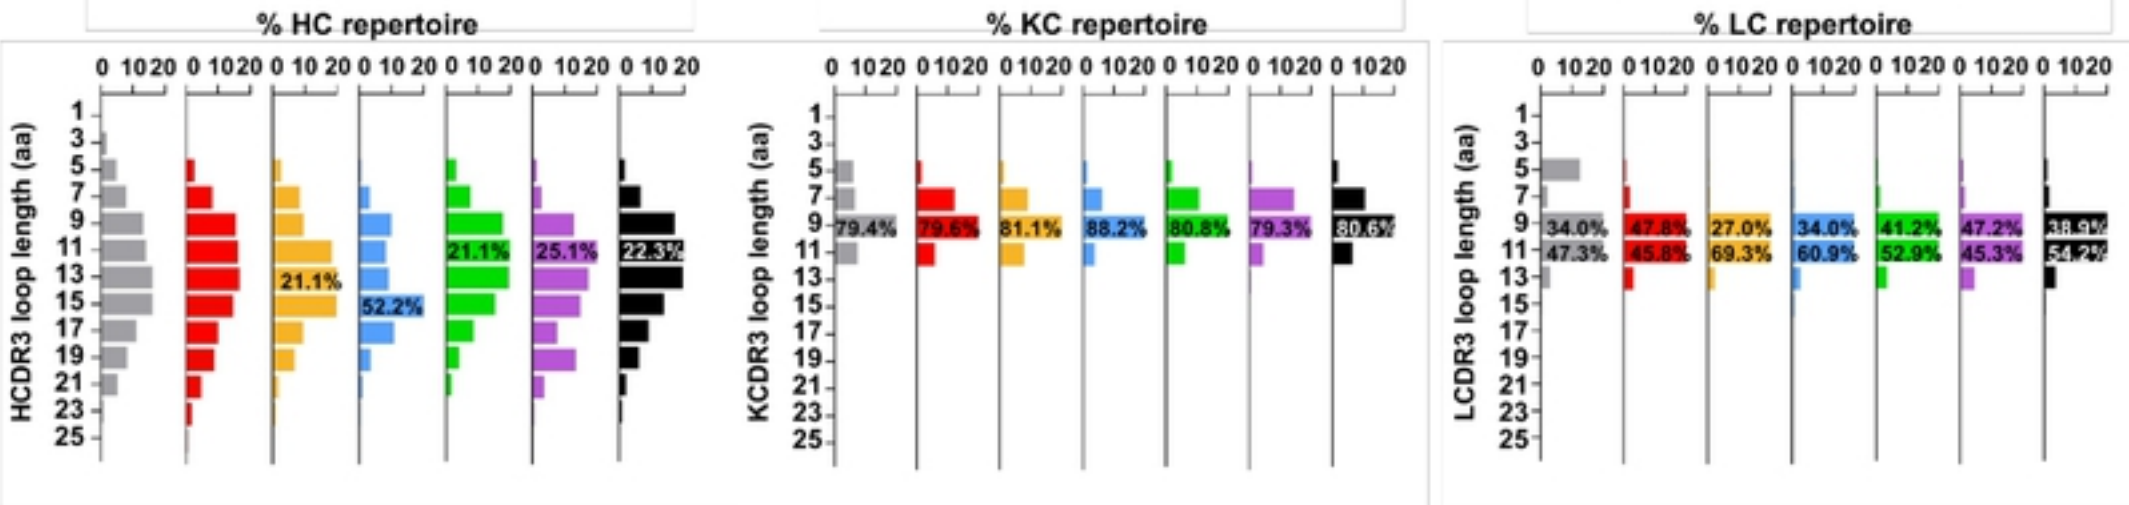

Fig 1

Fig 2

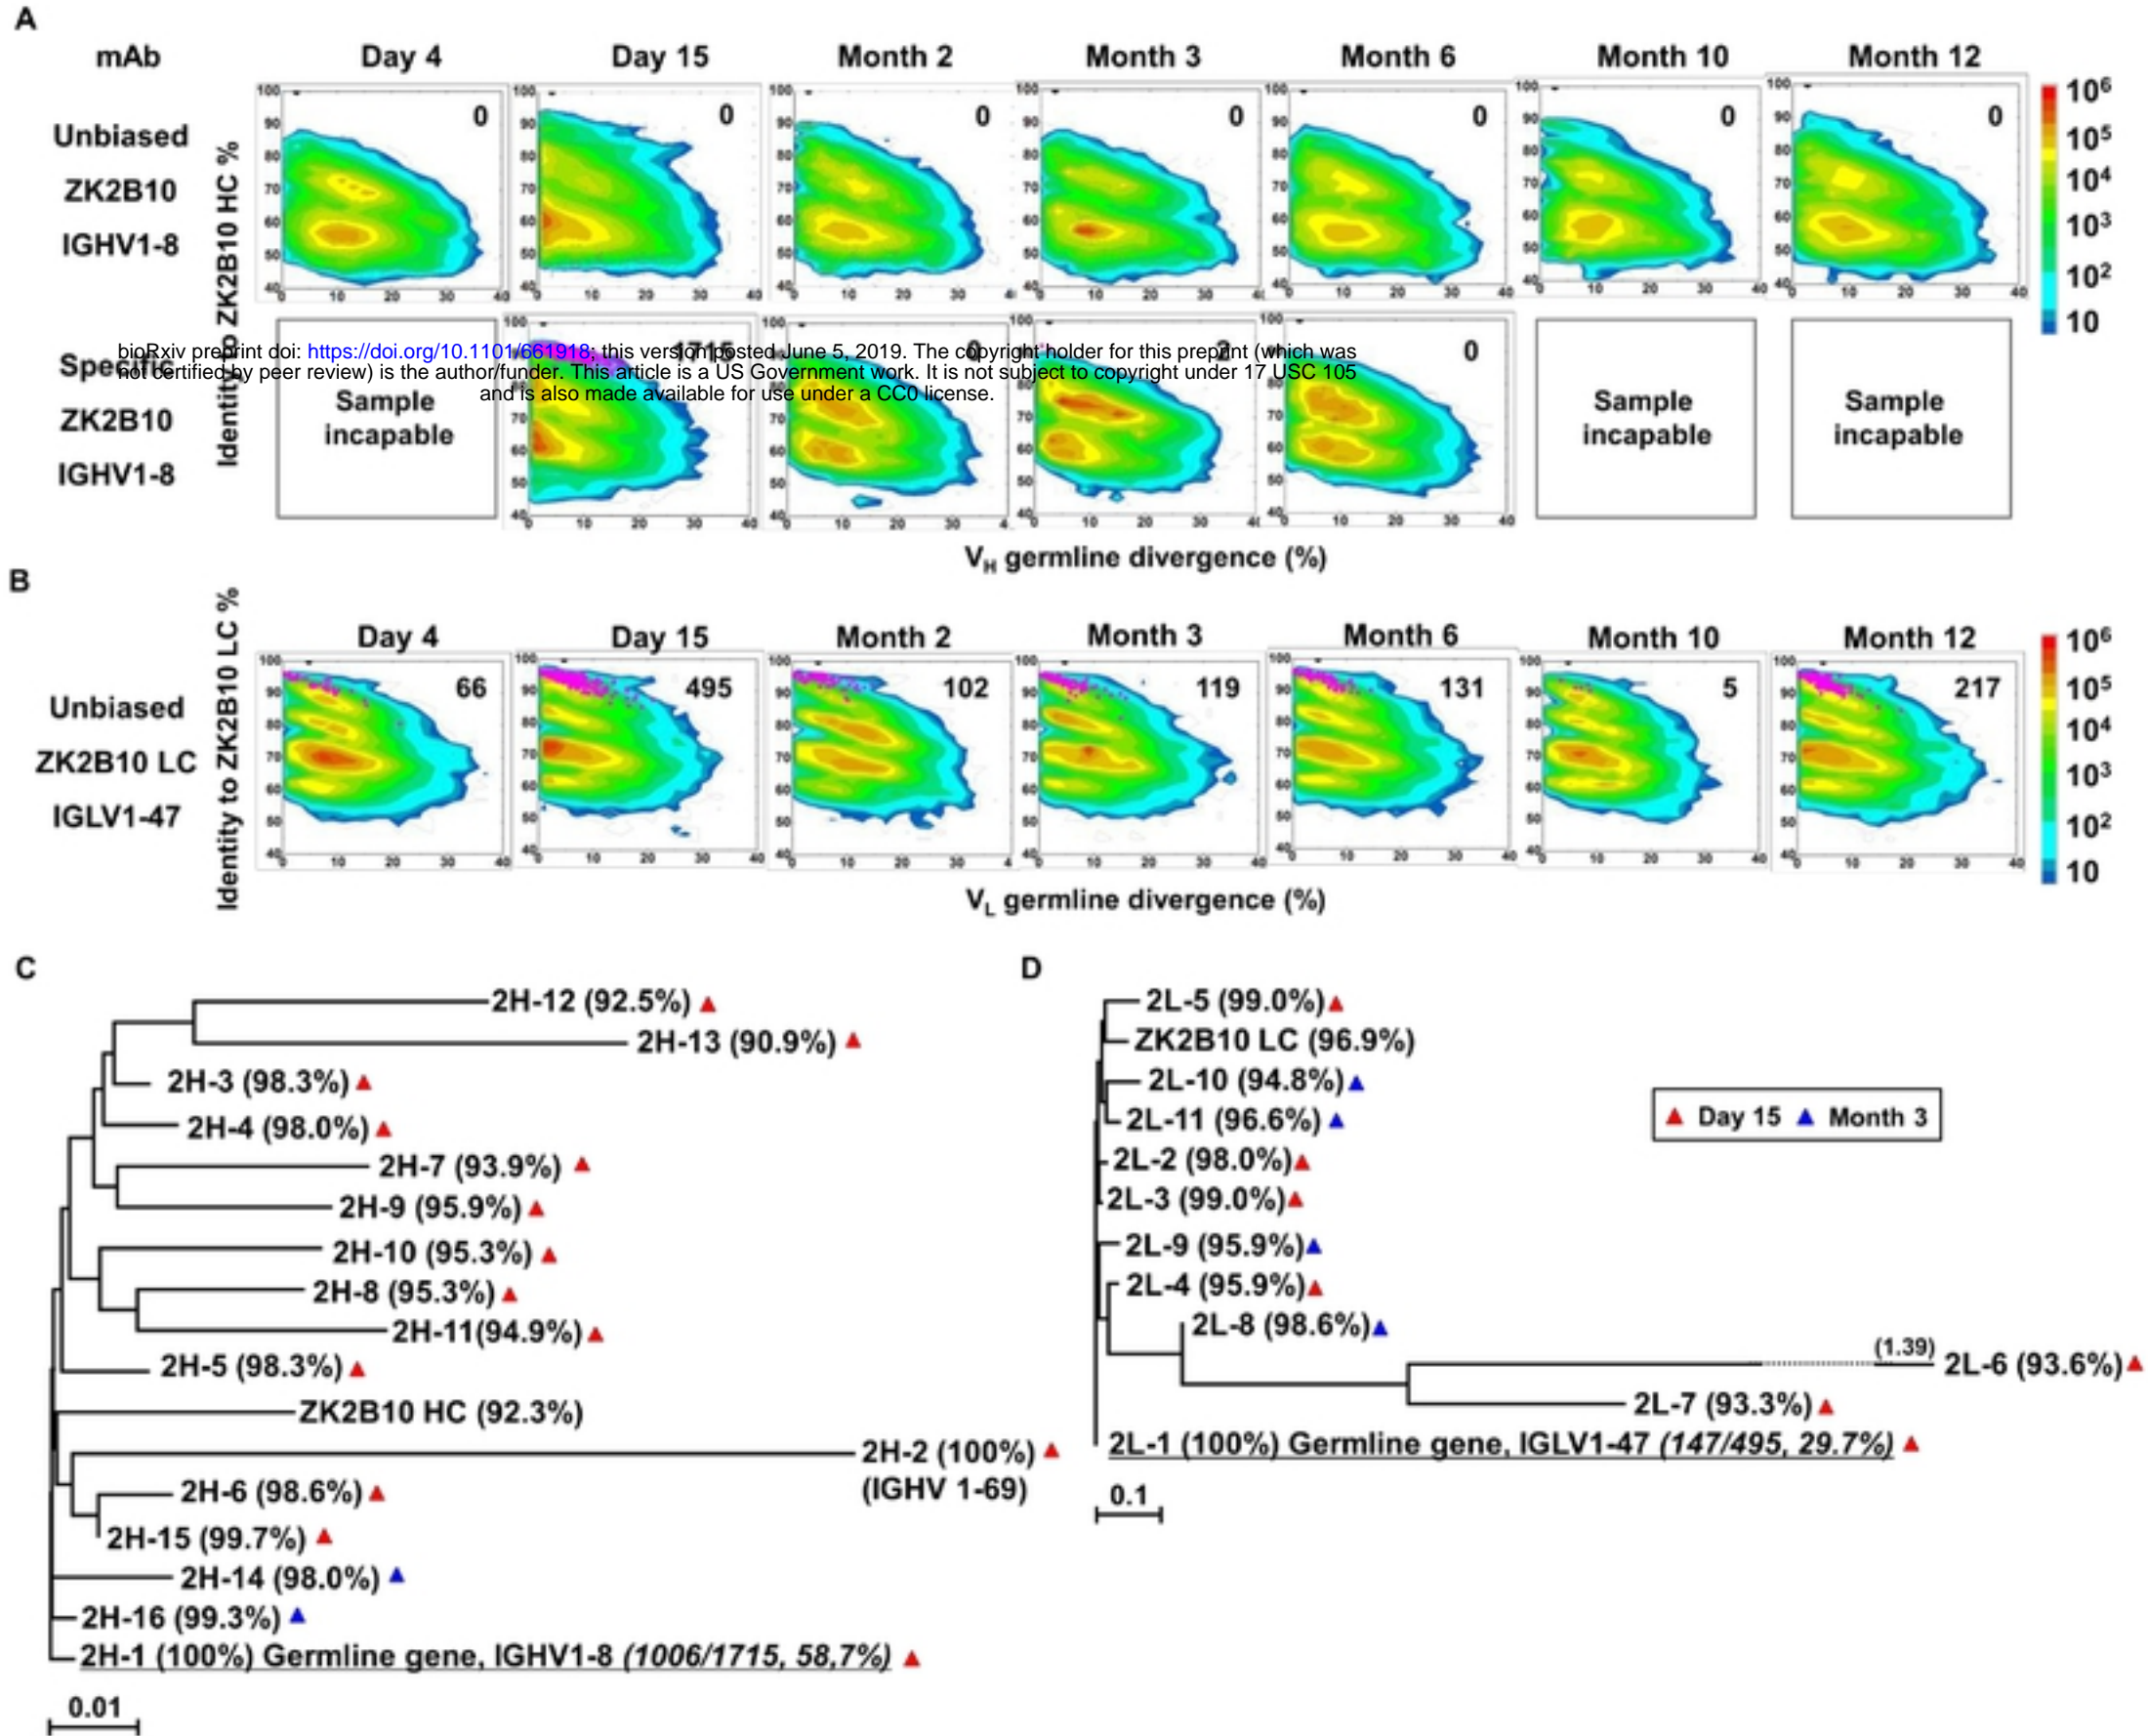

Fig 2

Fig 4

A

Summary of mAbs with ZK2B10-like heavy chains (HCs) paired with ZK2B10  $\lambda$  chain

| mAbs   | Time point | HC identity % | V <sub>H</sub> family | N <sub>read</sub> | Yield | EC50 (ng/ml) |             | IC50 (ng/ml) |              |        |
|--------|------------|---------------|-----------------------|-------------------|-------|--------------|-------------|--------------|--------------|--------|
|        |            |               |                       |                   |       | ZIKV E       | ZIKV E DIII | ZIKV (GZ01)  | ZIKV (MR766) | DENV2  |
| ZK2B10 | Month 3    | 92.3          | IGHV1-8*01            | -                 | +     | 3.3          | 7.1         | 16.6         | 29.4         | >500.0 |
| 2H-1   | Day 15     | 100.0         | IGHV1-8*01            | 1006 (58.7%)      | +     | 5.3          | 3.4         | 14.1         | 19.4         | >500.0 |
| 2H-2   | Day 15     | 100.0         | IGHV1-69*01           | 2                 | +     | >500.0       | >500.0      | >500.0       | >500.0       | >500.0 |
| 2H-3   | Day 15     | 98.3          | IGHV1-8*01            | 16                | +     | 23.7         | 39.0        | 289.4        | 334.1        | >500.0 |
| 2H-4   | Day 15     | 98.0          | IGHV1-8*01            | 2                 | +     | 6.5          | 8.4         | 19.4         | 36.2         | >500.0 |
| 2H-5   | Day 15     | 98.3          | IGHV1-8*01            | 2                 | +     | 6.2          | 4.8         | 22.1         | 48.5         | >500.0 |
| 2H-6   | Day 15     | 98.6          | IGHV1-8*01            | 2                 | +     | 4.6          | 3.9         | 23.3         | 42.7         | >500.0 |
| 2H-7   | Day 15     | 93.9          | IGHV1-8*01            | 1                 | -     | -            | -           | -            | -            | -      |
| 2H-8   | Day 15     | 95.3          | IGHV1-8*01            | 1                 | -     | -            | -           | -            | -            | -      |
| 2H-9   | Day 15     | 95.9          | IGHV1-8*01            | 1                 | +     | 4.2          | 5.9         | 28.7         | 49.0         | >500.0 |
| 2H-10  | Day 15     | 95.3          | IGHV1-8*01            | 1                 | +     | 5.2          | 11.2        | 26.5         | 42.3         | >500.0 |
| 2H-11  | Day 15     | 94.9          | IGHV1-8*01            | 1                 | -     | -            | -           | -            | -            | -      |
| 2H-12  | Day 15     | 92.5          | IGHV1-8*01            | 1                 | -     | -            | -           | -            | -            | -      |
| 2H-13  | Day 15     | 90.9          | IGHV1-8*01            | 1                 | -     | -            | -           | -            | -            | -      |
| 2H-15  | Day 15     | 99.7          | IGHV1-8*01            | 3                 | +     | 7.5          | 10.0        | 48.3         | 82.4         | >500.0 |
| 2H-14  | Month 3    | 98.0          | IGHV1-8*01            | 1                 | +     | 241.8        | 215.2       | 489.1        | >500.0       | >500.0 |
| 2H-16  | Month 3    | 99.3          | IGHV1-8*01            | 1                 | +     | 5.8          | 4.1         | 20.7         | 51.9         | >500.0 |

B

bioRxiv preprint doi: <https://doi.org/10.1101/661918>; this version posted June 5, 2019. The copyright holder for this preprint (which was not certified by peer review) is the author/funder. This article is a US Government work. It is not subject to copyright under 17 USC 105 and is also made available for use under a CC0 license.

Summary of mAbs with ZK2B10-like heavy chains (HCs) paired with ZK2B10 heavy chain

| mAbs   | Time point | LC identity % | V <sub>L</sub> family | N <sub>read</sub> | Yield | EC50 (ng/ml) |             | IC50 (ng/ml) |              |        |
|--------|------------|---------------|-----------------------|-------------------|-------|--------------|-------------|--------------|--------------|--------|
|        |            |               |                       |                   |       | ZIKV E       | ZIKV E DIII | ZIKV (GZ01)  | ZIKV (MR766) | DENV2  |
| ZK2B10 | Month 3    | 96.9          | IGLV1-47*01           | -                 | +     | 3.3          | 7.1         | 16.6         | 29.4         | >500.0 |
| 2L-1   | Day 15     | 100.0         | IGLV1-47*01           | 147 (29.7%)       | +     | >500.0       | >500.0      | >500.0       | >500.0       | >500.0 |
| 2L-2   | Day 15     | 98.0          | IGLV1-47*01           | 1                 | +     | 215.8        | 267.3       | 134.2        | 152.7        | >500.0 |
| 2L-3   | Day 15     | 99.0          | IGLV1-47*01           | 1                 | +     | >500.0       | >500.0      | >500.0       | >500.0       | >500.0 |
| 2L-4   | Day 15     | 95.9          | IGLV1-47*01           | 1                 | -     | -            | -           | -            | -            | -      |
| 2L-5   | Day 15     | 99.0          | IGLV1-47*01           | 1                 | -     | -            | -           | -            | -            | -      |
| 2L-6   | Day 15     | 93.6          | IGLV1-47*01           | 1                 | +     | 356.2        | 335.0       | 361.3        | 455.6        | >500.0 |
| 2L-7   | Day 15     | 93.3          | IGLV1-47*01           | 1                 | -     | -            | -           | -            | -            | -      |
| 2L-8   | Month 3    | 98.6          | IGLV1-47*01           | 13                | +     | >500.0       | >500.0      | >500.0       | >500.0       | >500.0 |
| 2L-9   | Month 3    | 95.9          | IGLV1-47*01           | 1                 | +     | >500.0       | >500.0      | >500.0       | >500.0       | >500.0 |
| 2L-10  | Month 3    | 94.8          | IGLV1-47*01           | 1                 | -     | -            | -           | -            | -            | -      |
| 2L-11  | Month 3    | 96.6          | IGLV1-47*01           | 1                 | +     | >500.0       | >500.0      | >500.0       | >500.0       | >500.0 |

C

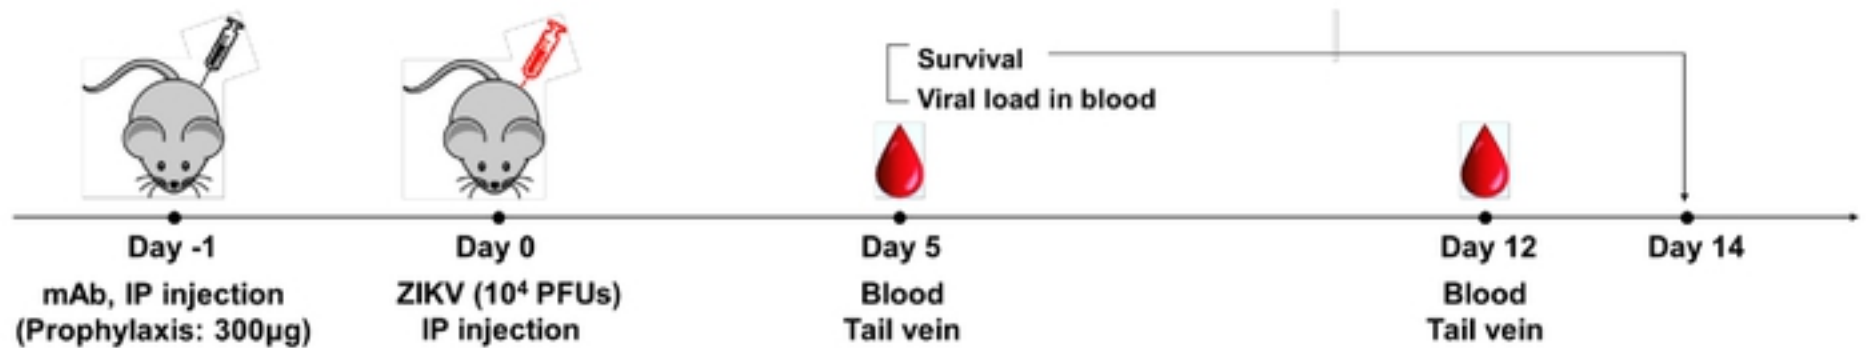

D

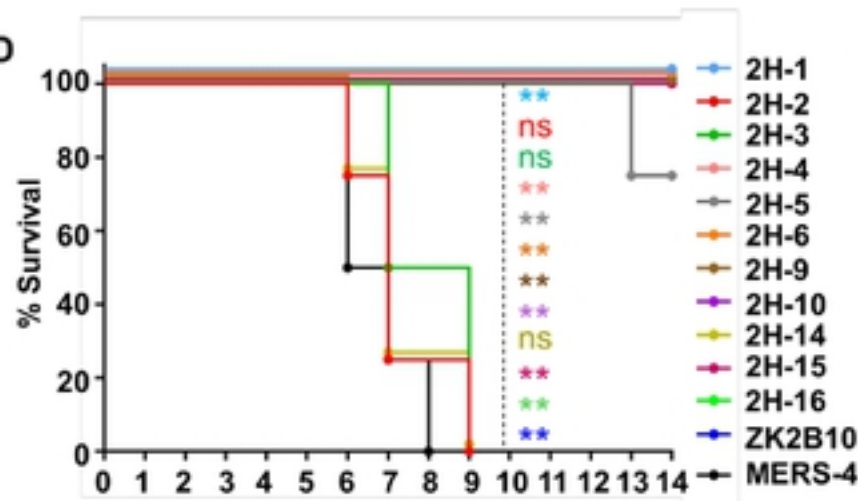

F

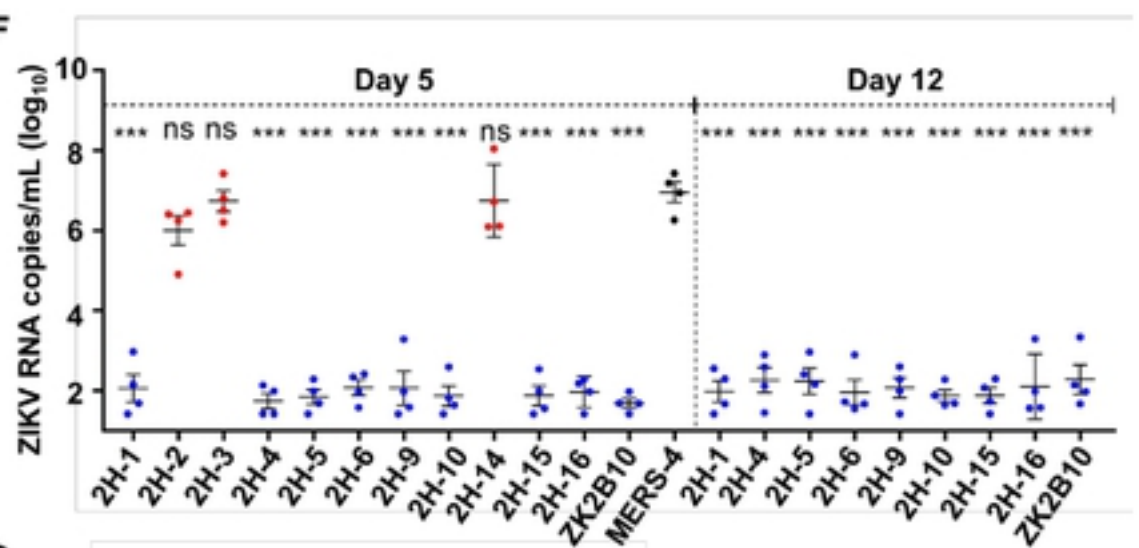

E

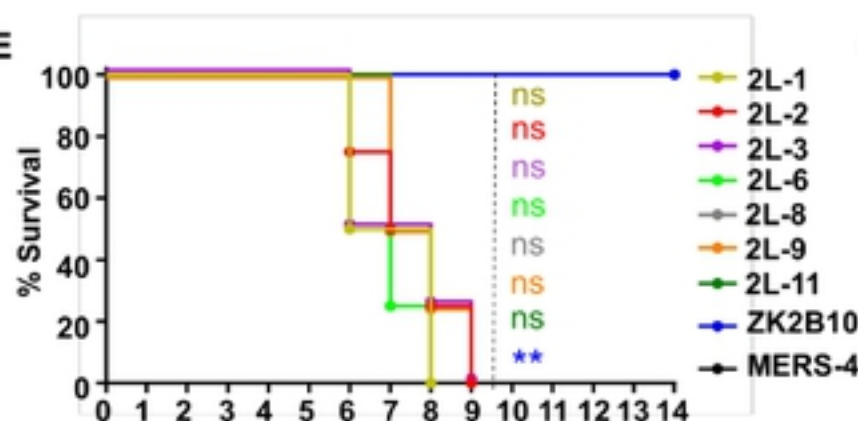

G

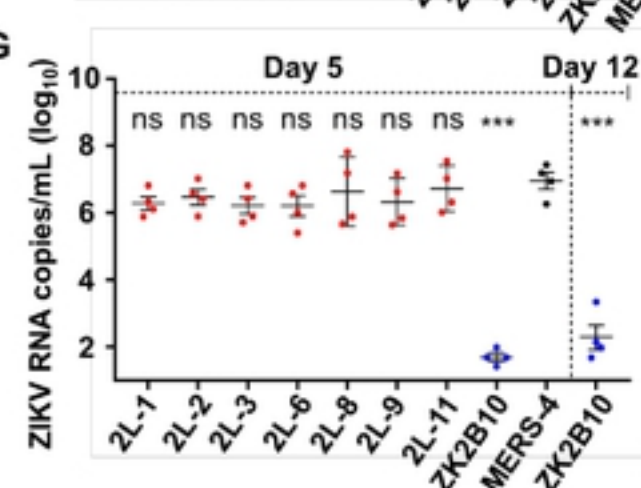

Fig 4

Fig 5

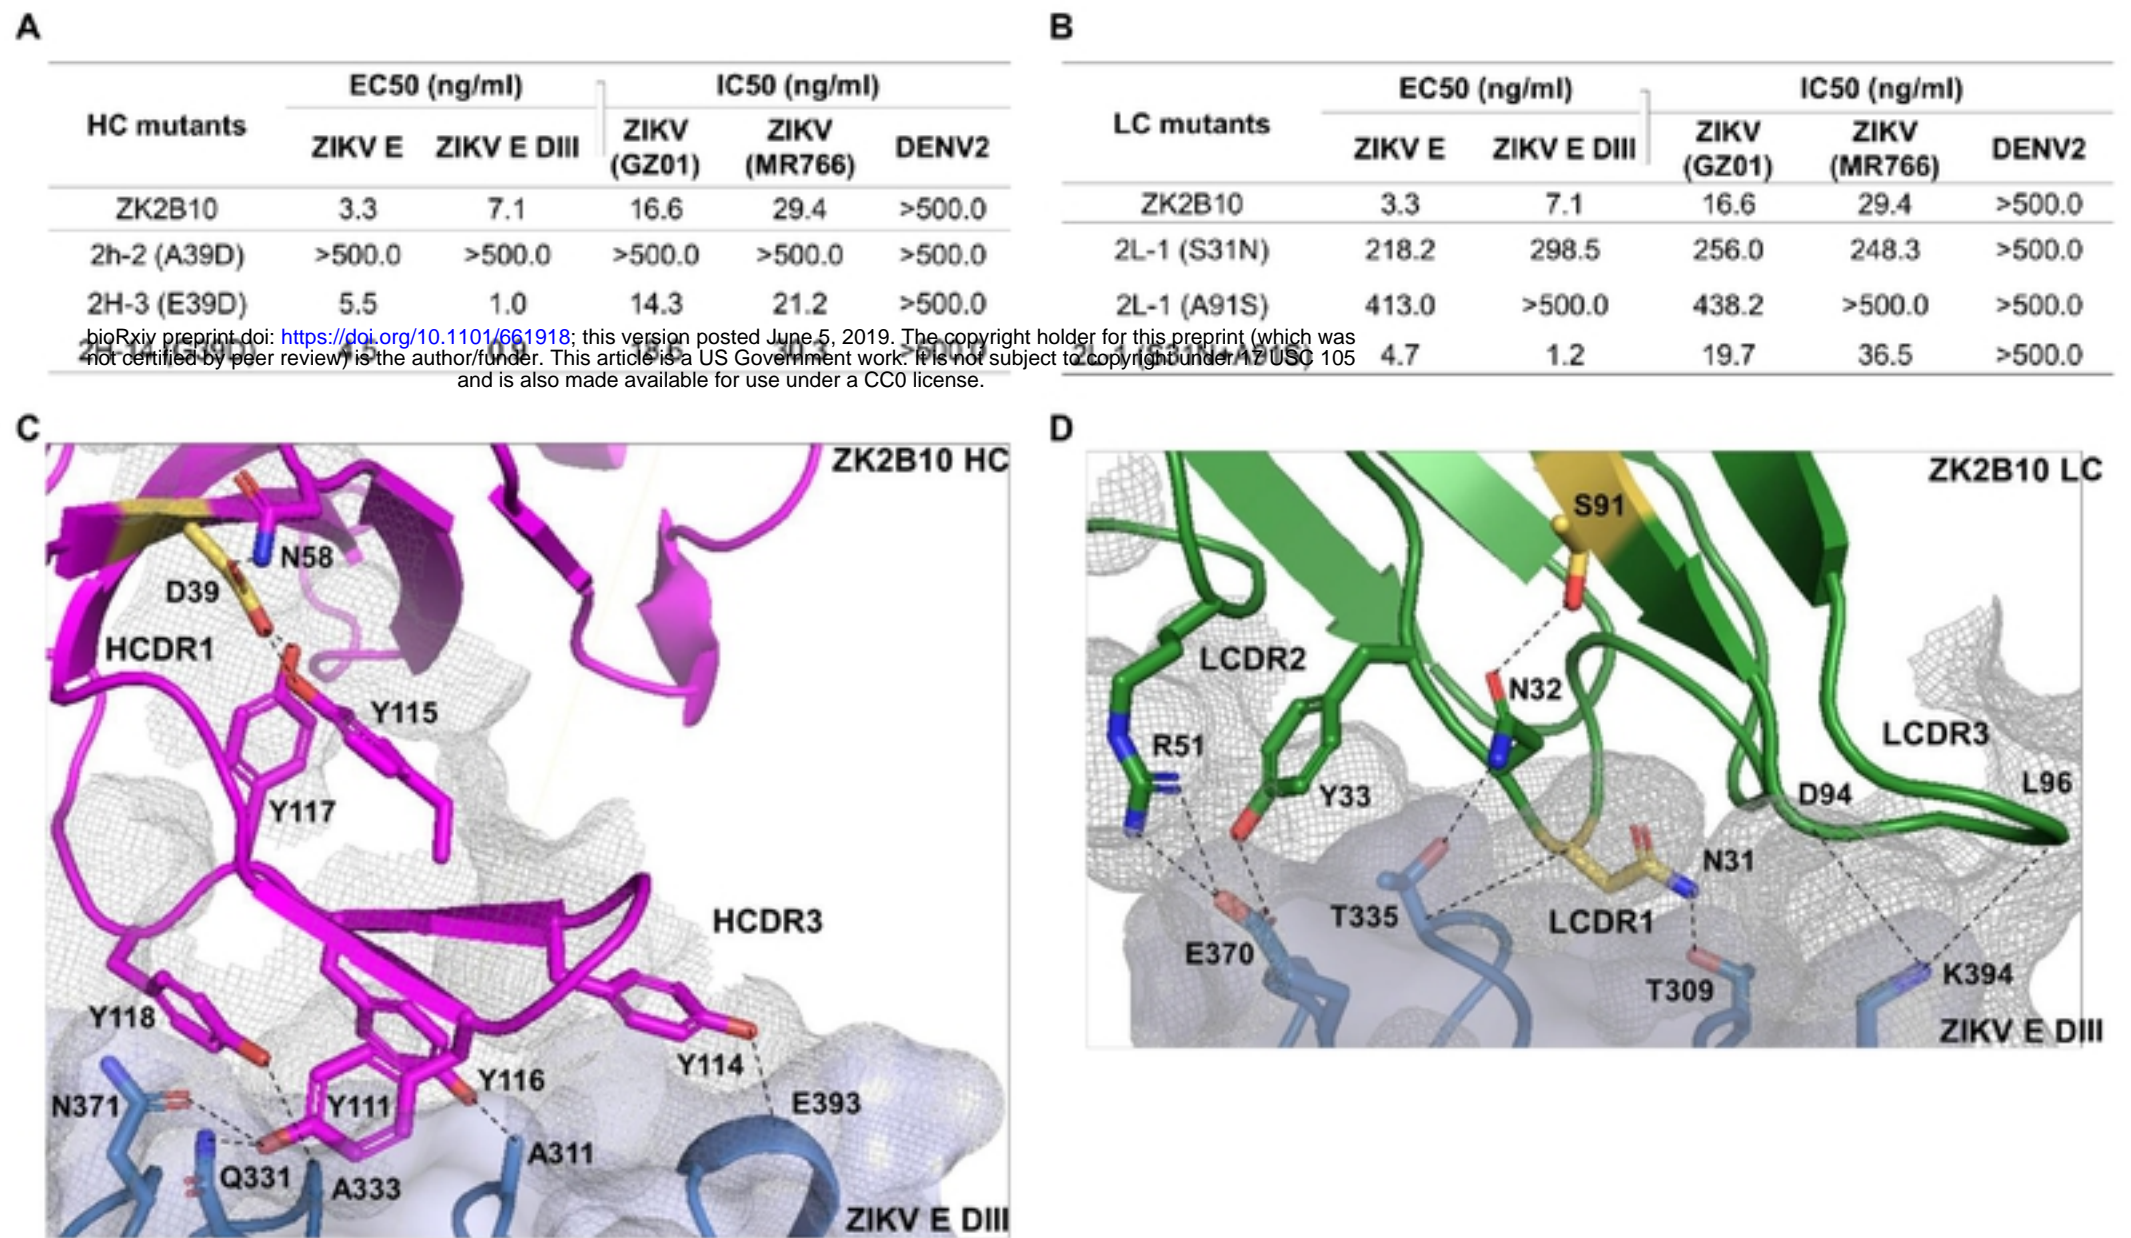

Fig 5

bioRxiv preprint doi: <https://doi.org/10.1101/661918>; this version posted June 5, 2019. The copyright holder for this preprint (which was not certified by peer review) is the author/funder. This article is a US Government work. It is not subject to copyright under 17 USC 105 and is also made available for use under a CC0 license.

Fig 3

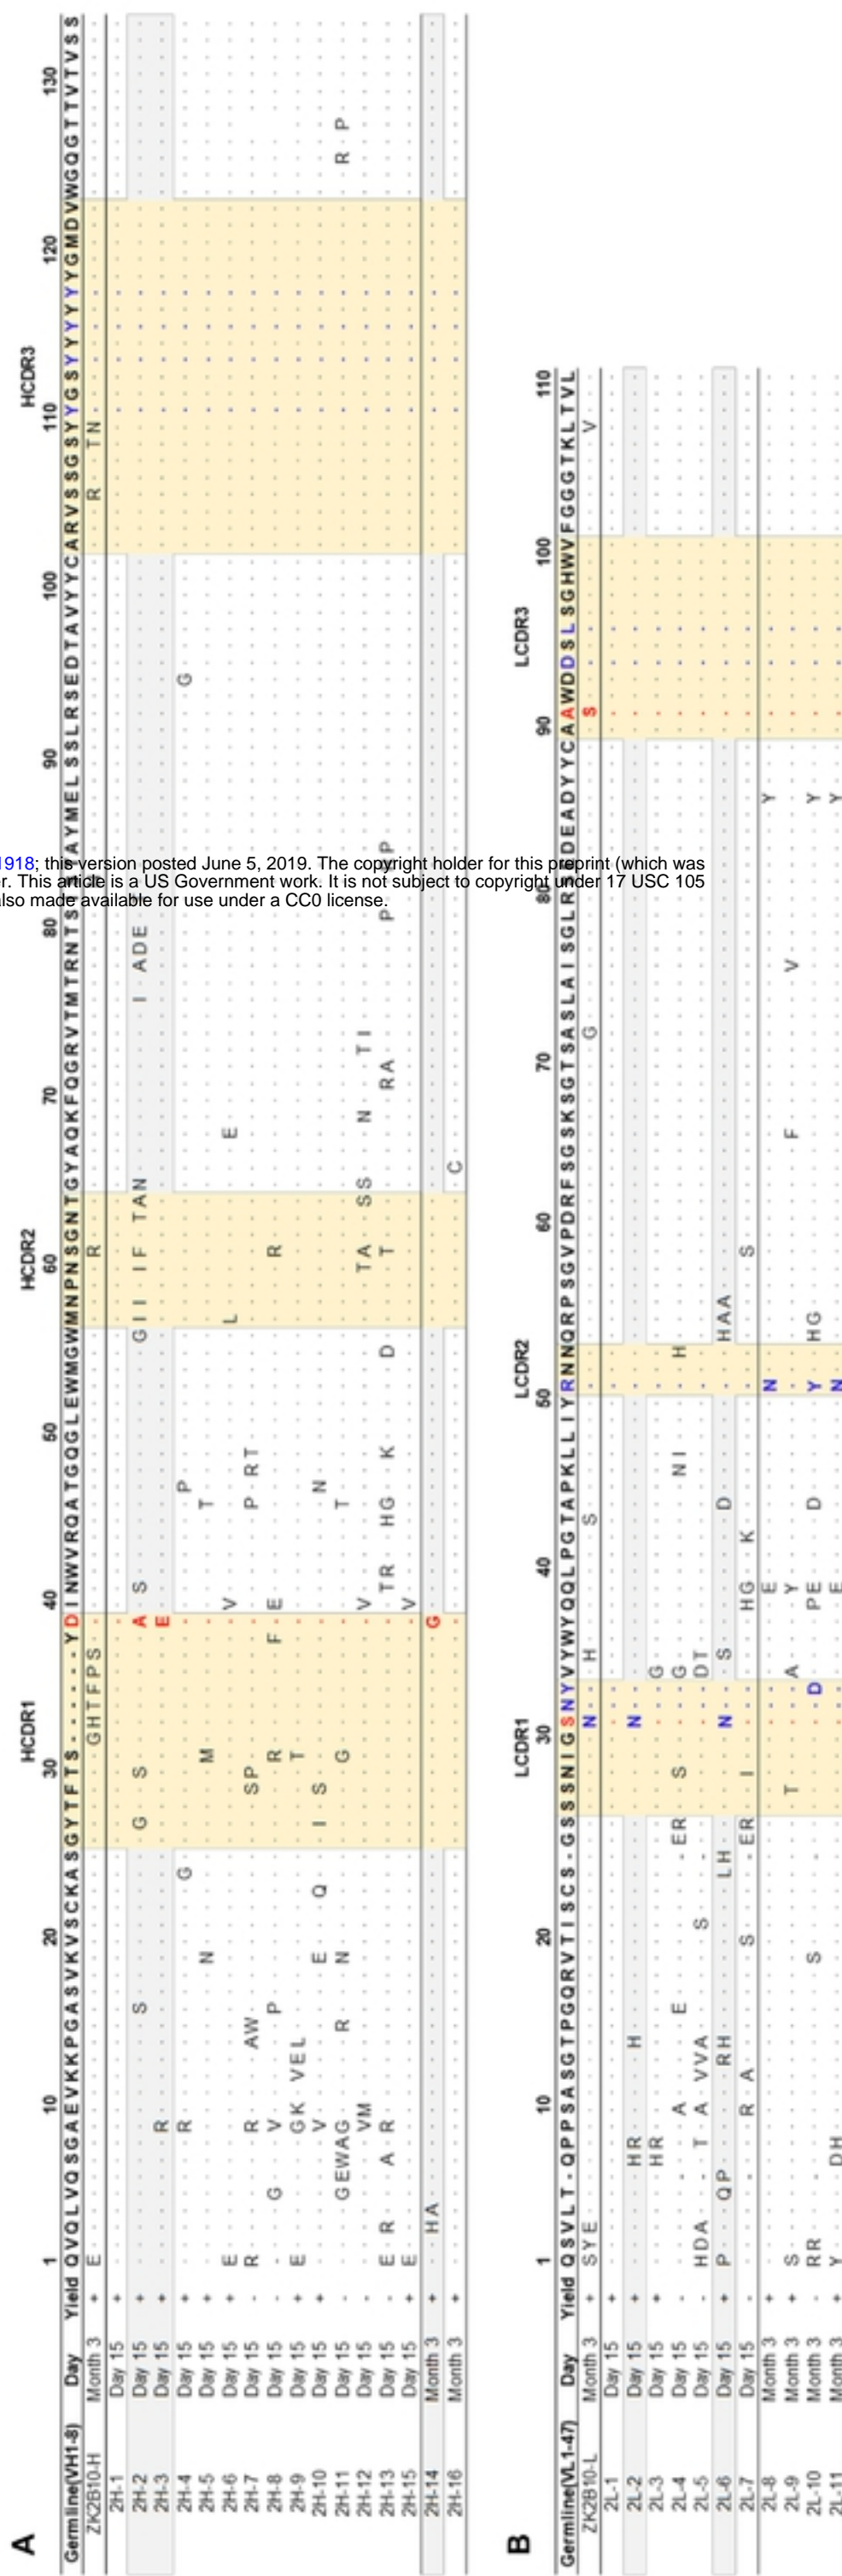

Source: https://www.biorxiv.org/content/10.1101/661918v1.full.pdf
